# Supplementary material for: DNA Methylation Landscapes of Human Fetal Development
Source: PLoS Genet. 2015 Oct 22;11(10):e1005583. doi: 10.1371/journal.pgen.1005583 (PMC4619663; doi:10.1371/journal.pgen.1005583)
Supplement: S3 Table — (XLSX) [file pgen.1005583.s009.xlsx]

## Sheet: Table S3 GO dynamic
Gene ontology loss of methylation																			Gene ontology gain of methylation
Amnion					Muscle					Adrenal				Pancreas					Amnion					Muscle					Adrenal					Pancreas
Term	#Genes	PValue	FDR		Term	#Genes	PValue	FDR		Term	PValue	FDR		Term	#Genes	PValue	FDR		Term	#Genes	PValue	FDR		Term	#Genes	PValue	FDR		Term	#Genes	PValue	FDR		Term	#Genes	PValue	FDR
GO:0051056~regulation of small GTPase mediated signal transduction	111	5.93711e-09	1.13646e-05		GO:0051056~regulation of small GTPase mediated signal transduction	120	2.05972e-10	3.9406e-07		GO:0010604~positive regulation of macromolecule metabolic process	183	0.00290634		GO:0006955~immune response	112	0.000154584	0.287561		GO:0048598~embryonic morphogenesis	111	7.11037e-17	2.10942e-13		GO:0006357~regulation of transcription from RNA polymerase II promoter	223	1.42343e-24	2.67659e-21		GO:0006357~regulation of transcription from RNA polymerase II promoter	304	9.02e-27	1.72e-23		GO:0006357~regulation of transcription from RNA polymerase II promoter	244	4.88e-24	9.21e-21
GO:0006468~protein amino acid phosphorylation	248	5.95987e-09	1.14082e-05		GO:0044057~regulation of system process	137	2.9943e-09	5.72862e-06		GO:0032268~regulation of cellular protein metabolic process	111	0.00429173		GO:0007242~intracellular signaling cascade	197	0.000554662	1.02816		GO:0001501~skeletal system development	106	5.44368e-13	1.02812e-09		GO:0045893~positive regulation of transcription, DNA-dependent	162	9.91833e-23	1.86503e-19		GO:0051254~positive regulation of RNA metabolic process	222	3.99e-26	7.61e-23		GO:0048598~embryonic morphogenesis	130	6.28e-23	1.19e-19
GO:0046578~regulation of Ras protein signal transduction	94	4.14356e-08	7.93145e-05		GO:0007242~intracellular signaling cascade	447	4.06553e-09	7.77807e-06		GO:0007242~intracellular signaling cascade	248	0.00654148		GO:0010608~posttranscriptional regulation of gene expression	45	0.000576253	1.06798		GO:0048568~embryonic organ development	69	5.98175e-13	1.12982e-09		GO:0030182~neuron differentiation	151	2.12096e-22	3.98822e-19		GO:0048598~embryonic morphogenesis	159	7.29e-26	1.39e-22		GO:0009792~embryonic development ending in birth or egg hatching	130	7.43e-19	1.4e-15
GO:0042981~regulation of apoptosis	282	1.10037e-07	0.000210629		GO:0030029~actin filament-based process	110	5.2673e-09	1.00773e-05		GO:0044093~positive regulation of molecular function	130	0.00689345		GO:0070482~response to oxygen levels	33	0.000617265	1.14358		GO:0051254~positive regulation of RNA metabolic process	143	8.69887e-13	1.64293e-09		GO:0051254~positive regulation of RNA metabolic process	162	2.63531e-22	4.95539e-19		GO:0045893~positive regulation of transcription, DNA-dependent	219	2.09e-25	3.98e-22		GO:0043009~chordate embryonic development	129	8.96e-19	1.69e-15
GO:0022604~regulation of cell morphogenesis	63	1.47429e-07	0.000282203		GO:0007010~cytoskeleton organization	177	9.64915e-09	1.84605e-05		GO:0010627~regulation of protein kinase cascade	65	0.0147488		GO:0044057~regulation of system process	60	0.000726924	1.34544		GO:0010628~positive regulation of gene expression	164	2.00351e-12	3.7841e-09		GO:0045941~positive regulation of transcription	180	9.06033e-22	1.70369e-18		GO:0045944~positive regulation of transcription from RNA polymerase II promoter	181	7.12e-25	1.36e-21		GO:0048568~embryonic organ development	82	3.28e-18	6.18e-15
GO:0009967~positive regulation of signal transduction	120	1.49807e-07	0.000286755		GO:0022604~regulation of cell morphogenesis	68	1.19437e-08	2.28504e-05		GO:0043085~positive regulation of catalytic activity	116	0.0190173		GO:0006417~regulation of translation	32	0.00100847	1.86192		GO:0045893~positive regulation of transcription, DNA-dependent	141	2.04938e-12	3.87069e-09		GO:0045944~positive regulation of transcription from RNA polymerase II promoter	134	1.2805e-21	2.40784e-18		GO:0010628~positive regulation of gene expression	251	2.88e-24	5.48e-21		GO:0045893~positive regulation of transcription, DNA-dependent	166	4.35e-18	8.21e-15
GO:0008219~cell death	253	1.60966e-07	0.000308115		GO:0030155~regulation of cell adhesion	70	1.21627e-08	2.32694e-05		GO:0033674~positive regulation of kinase activity	61	0.0285377		GO:0042981~regulation of apoptosis	132	0.0011354	2.09393		GO:0000902~cell morphogenesis	113	2.20054e-12	4.1563e-09		GO:0010628~positive regulation of gene expression	183	2.03951e-21	3.83507e-18		GO:0045941~positive regulation of transcription	244	1.03e-23	1.97e-20		GO:0007389~pattern specification process	109	9.69e-18	1.83e-14
GO:0007010~cytoskeleton organization	164	1.7414e-07	0.000333331		GO:0003012~muscle system process	83	1.28169e-08	2.45209e-05						GO:0043067~regulation of programmed cell death	133	0.00127144	2.34203		GO:0031328~positive regulation of cellular biosynthetic process	185	2.90802e-12	5.49245e-09		GO:0045935~positive regulation of nucleobase, nucleoside, nucleotide and nucleic acid metabolic process	192	3.73548e-21	7.02414e-18		GO:0010557~positive regulation of macromolecule biosynthetic process	270	8.98e-23	1.71e-19		GO:0051254~positive regulation of RNA metabolic process	166	1.08e-17	2.04e-14
GO:0007242~intracellular signaling cascade	414	1.90401e-07	0.000364458		GO:0006928~cell motion	192	2.1147e-08	4.04579e-05						GO:0012502~induction of programmed cell death	60	0.00129462	2.38424		GO:0006357~regulation of transcription from RNA polymerase II promoter	194	3.15464e-12	5.95818e-09		GO:0031328~positive regulation of cellular biosynthetic process	203	1.5058e-20	2.83148e-17		GO:0001501~skeletal system development	157	3.34e-22	6.37e-19		GO:0010557~positive regulation of macromolecule biosynthetic process	208	1.57e-17	2.96e-14
GO:0010647~positive regulation of cell communication	131	2.02229e-07	0.000387098		GO:0030036~actin cytoskeleton organization	103	2.1215e-08	4.0588e-05						GO:0010941~regulation of cell death	133	0.00144004	2.64867		GO:0000904~cell morphogenesis involved in differentiation	86	3.52854e-12	6.66441e-09		GO:0010557~positive regulation of macromolecule biosynthetic process	196	2.60107e-20	4.891e-17		GO:0045935~positive regulation of nucleobase, nucleoside, nucleotide and nucleic acid metabolic process	259	4.87e-22	9.28e-19		GO:0010628~positive regulation of gene expression	190	2.59e-17	4.89e-14
GO:0006915~apoptosis	217	2.18632e-07	0.000418497		GO:0022610~biological adhesion	263	4.03441e-08	7.71853e-05						GO:0043068~positive regulation of programmed cell death	77	0.00144062	2.64971		GO:0045944~positive regulation of transcription from RNA polymerase II promoter	115	9.57762e-12	1.80895e-08		GO:0009891~positive regulation of biosynthetic process	204	4.09667e-20	7.70331e-17		GO:0051173~positive regulation of nitrogen compound metabolic process	264	1.17e-21	2.22e-18		GO:0045944~positive regulation of transcription from RNA polymerase II promoter	136	4.22e-17	7.97e-14
GO:0010941~regulation of cell death	283	2.98652e-07	0.000571668		GO:0007155~cell adhesion	262	5.53937e-08	0.000105978						GO:0010942~positive regulation of cell death	77	0.00163575	3.00346		GO:0045935~positive regulation of nucleobase, nucleoside, nucleotide and nucleic acid metabolic process	171	9.76249e-12	1.84388e-08		GO:0051173~positive regulation of nitrogen compound metabolic process	193	6.27035e-20	1.17907e-16		GO:0031328~positive regulation of cellular biosynthetic process	276	1.21e-21	2.3e-18		GO:0045941~positive regulation of transcription	185	4.97e-17	9.37e-14
GO:0043067~regulation of programmed cell death	282	2.99792e-07	0.00057385		GO:0007167~enzyme linked receptor protein signaling pathway	143	1.14054e-07	0.000218205						GO:0043065~positive regulation of apoptosis	76	0.00180917	3.31685		GO:0045941~positive regulation of transcription	158	1.00897e-11	1.90568e-08		GO:0048598~embryonic morphogenesis	113	2.34779e-19	4.41474e-16		GO:0009891~positive regulation of biosynthetic process	279	1.36e-21	2.59e-18		GO:0045892~negative regulation of transcription, DNA-dependent	131	5.24e-17	9.88e-14
GO:0007167~enzyme linked receptor protein signaling pathway	135	3.05367e-07	0.00058452		GO:0051270~regulation of cell motion	89	1.89548e-07	0.000362637						GO:0006917~induction of apoptosis	59	0.00197577	3.61698		GO:0048562~embryonic organ morphogenesis	56	1.10843e-11	2.09352e-08		GO:0000904~cell morphogenesis involved in differentiation	96	1.70987e-18	3.2152e-15		GO:0009792~embryonic development ending in birth or egg hatching	159	1.25e-20	2.38e-17		GO:0048562~embryonic organ morphogenesis	67	1.38e-16	2.11e-13
GO:0016265~death	253	3.16258e-07	0.000605368		GO:0046578~regulation of Ras protein signal transduction	96	2.00347e-07	0.000383299						GO:0043408~regulation of MAPKKK cascade	26	0.00207498	3.79531		GO:0009891~positive regulation of biosynthetic process	185	1.17069e-11	2.21113e-08		GO:0048666~neuron development	119	2.01776e-18	3.79416e-15		GO:0043009~chordate embryonic development	157	3.42e-20	6.51e-17		GO:0010629~negative regulation of gene expression	168	2.32e-16	4.22e-13
GO:0012501~programmed cell death	219	3.22897e-07	0.000618075		GO:0006811~ion transport	283	2.21676e-07	0.000424103						GO:0008219~cell death	117	0.00220641	4.03104		GO:0043009~chordate embryonic development	105	1.75214e-11	3.30933e-08		GO:0051253~negative regulation of RNA metabolic process	124	2.85508e-18	5.36864e-15		GO:0030182~neuron differentiation	191	9.62e-20	1.83e-16		GO:0000122~negative regulation of transcription from RNA polymerase II promoter	106	2.61e-16	4.22e-13
GO:0033674~positive regulation of kinase activity	98	4.04113e-07	0.000773535		GO:0006936~muscle contraction	74	2.25268e-07	0.000430977						GO:0015800~acidic amino acid transport	8	0.00233978	4.26971		GO:0010557~positive regulation of macromolecule biosynthetic process	176	1.87638e-11	3.544e-08		GO:0045892~negative regulation of transcription, DNA-dependent	122	5.13225e-18	9.65059e-15		GO:0048568~embryonic organ development	98	1.03e-19	1.96e-16		GO:0051253~negative regulation of RNA metabolic process	131	3.58e-16	6.33e-13
GO:0016310~phosphorylation	276	5.29645e-07	0.00101382		GO:0033674~positive regulation of kinase activity	101	1.05219e-06	0.00201301						GO:0044093~positive regulation of molecular function	98	0.00236957	4.32294		GO:0051173~positive regulation of nitrogen compound metabolic process	174	1.96617e-11	3.71358e-08		GO:0010629~negative regulation of gene expression	156	6.00383e-18	1.12895e-14		GO:0003002~regionalization	105	2.13e-18	4.06e-15		GO:0016481~negative regulation of transcription	156	4.84e-16	8.33e-13
GO:0030879~mammary gland development	37	6.45795e-07	0.00123615		GO:0045860~positive regulation of protein kinase activity	98	1.1303e-06	0.00216244						GO:0007243~protein kinase cascade	67	0.00237162	4.3266		GO:0042127~regulation of cell proliferation	200	2.38521e-11	4.50503e-08		GO:0016481~negative regulation of transcription	144	3.85705e-17	7.25273e-14		GO:0007389~pattern specification process	129	1.26e-17	2.41e-14		GO:0031328~positive regulation of cellular biosynthetic process	211	6.43e-16	1.25e-12
GO:0030029~actin filament-based process	99	6.71451e-07	0.00128526		GO:0009719~response to endogenous stimulus	160	1.24026e-06	0.0023728						GO:0008285~negative regulation of cell proliferation	65	0.00238054	4.34255		GO:0009792~embryonic development ending in birth or egg hatching	105	3.20199e-11	6.04771e-08		GO:0048812~neuron projection morphogenesis	85	6.34634e-17	2.10942e-13		GO:0048562~embryonic organ morphogenesis	79	1.55e-17	2.96e-14		GO:0009891~positive regulation of biosynthetic process	213	7.42e-16	1.47e-12
GO:0006793~phosphorus metabolic process	327	7.58951e-07	0.00145275		GO:0019220~regulation of phosphate metabolic process	185	1.35104e-06	0.00258475											GO:0032989~cellular component morphogenesis	118	5.95052e-11	1.12389e-07		GO:0010604~positive regulation of macromolecule metabolic process	228	1.77939e-16	4.21885e-13		GO:0045165~cell fate commitment	81	1.6e-17	3.04e-14		GO:0003002~regionalization	85	1.24e-15	2.31e-12
GO:0006796~phosphate metabolic process	327	7.58951e-07	0.00145275		GO:0051174~regulation of phosphorus metabolic process	185	1.35104e-06	0.00258475											GO:0007389~pattern specification process	88	9.21801e-11	1.74104e-07		GO:0007389~pattern specification process	98	2.37987e-16	4.21885e-13		GO:0000904~cell morphogenesis involved in differentiation	120	4.66e-17	8.89e-14		GO:0031327~negative regulation of cellular biosynthetic process	179	2.7e-15	5.03e-12
GO:0030036~actin cytoskeleton organization	94	7.60777e-07	0.00145624		GO:0040012~regulation of locomotion	86	1.41448e-06	0.0027061											GO:0048812~neuron projection morphogenesis	75	9.92953e-11	1.87542e-07		GO:0031175~neuron projection development	95	2.78285e-16	6.21725e-13		GO:0010604~positive regulation of macromolecule metabolic process	312	1.92e-16	4.22e-13		GO:0045935~positive regulation of nucleobase, nucleoside, nucleotide and nucleic acid metabolic process	195	3.29e-15	6.28e-12
GO:0030030~cell projection organization	141	1.60614e-06	0.00307438		GO:0032147~activation of protein kinase activity	58	1.42141e-06	0.00271938											GO:0030182~neuron differentiation	126	1.23622e-10	2.33489e-07		GO:0051172~negative regulation of nitrogen compound metabolic process	154	1.087e-15	2.08722e-12		GO:0010629~negative regulation of gene expression	201	2.44e-15	4.65e-12		GO:0051173~positive regulation of nitrogen compound metabolic process	198	1.02e-14	1.93e-11
GO:0000902~cell morphogenesis	138	1.65826e-06	0.00317413		GO:0006816~calcium ion transport	68	1.46718e-06	0.00280694											GO:0010604~positive regulation of macromolecule metabolic process	214	1.25405e-10	2.36857e-07		GO:0048667~cell morphogenesis involved in neuron differentiation	82	1.44682e-15	2.70894e-12		GO:0016481~negative regulation of transcription	187	2.5e-15	4.65e-12		GO:0009890~negative regulation of biosynthetic process	180	1.18e-14	2.22e-11
GO:0051347~positive regulation of transferase activity	99	1.69647e-06	0.00324727		GO:0030334~regulation of cell migration	77	2.04548e-06	0.00391329											GO:0030030~cell projection organization	110	1.53732e-10	2.90359e-07		GO:0045934~negative regulation of nucleobase, nucleoside, nucleotide and nucleic acid metabolic process	152	1.613e-15	3.13083e-12		GO:0030030~cell projection organization	157	2.77e-15	5.28e-12		GO:0007507~heart development	88	1.77e-14	3.35e-11
GO:0007243~protein kinase cascade	141	1.91775e-06	0.00367082		GO:0008360~regulation of cell shape	32	2.51535e-06	0.0048122											GO:0035295~tube development	76	1.6144e-10	3.04916e-07		GO:0009792~embryonic development ending in birth or egg hatching	112	2.19456e-15	4.17444e-12		GO:0048705~skeletal system morphogenesis	67	3.77e-15	7.19e-12		GO:0045165~cell fate commitment	65	3.2e-14	6.03e-11
GO:0001568~blood vessel development	100	2.14681e-06	0.00410926		GO:0042325~regulation of phosphorylation	177	3.38685e-06	0.00647944											GO:0031175~neuron projection development	84	3.23729e-10	6.11438e-07		GO:0051252~regulation of RNA metabolic process	399	2.62032e-15	5.00711e-12		GO:0045892~negative regulation of transcription, DNA-dependent	153	3.86e-15	7.41e-12		GO:0030182~neuron differentiation	145	4.64e-14	8.76e-11
GO:0032989~cellular component morphogenesis	150	2.39014e-06	0.00457501		GO:0040017~positive regulation of locomotion	50	3.39229e-06	0.00648985											GO:0048667~cell morphogenesis involved in neuron differentiation	73	3.49967e-10	6.60994e-07		GO:0043009~chordate embryonic development	111	3.00807e-15	5.63993e-12		GO:0009952~anterior/posterior pattern formation	78	4.58e-15	8.67e-12		GO:0010558~negative regulation of macromolecule biosynthetic process	171	9.05e-14	1.71e-10
GO:0042127~regulation of cell proliferation	267	2.92494e-06	0.00559867		GO:0030001~metal ion transport	178	3.40354e-06	0.00651138											GO:0003002~regionalization	69	5.96656e-10	1.12692e-06		GO:0000122~negative regulation of transcription from RNA polymerase II promoter	95	3.09452e-15	5.85088e-12		GO:0051253~negative regulation of RNA metabolic process	154	9.31e-15	1.78e-11		GO:0051172~negative regulation of nitrogen compound metabolic process	164	1.05e-13	1.99e-10
GO:0045860~positive regulation of protein kinase activity	92	3.80716e-06	0.00728727		GO:0009725~response to hormone stimulus	145	3.4799e-06	0.00665746											GO:0048666~neuron development	102	6.7696e-10	1.2786e-06		GO:0007409~axonogenesis	77	3.90481e-15	7.30527e-12		GO:0000902~cell morphogenesis	152	1.69e-14	3.22e-11		GO:0045934~negative regulation of nucleobase, nucleoside, nucleotide and nucleic acid metabolic process	162	1.31e-13	2.48e-10
GO:0000904~cell morphogenesis involved in differentiation	100	4.11328e-06	0.00787321		GO:0030324~lung development	51	4.06568e-06	0.00777808											GO:0007242~intracellular signaling cascade	285	8.96824e-10	1.69386e-06		GO:0006355~regulation of transcription, DNA-dependent	390	6.35436e-15	1.19016e-11		GO:0048666~neuron development	146	1.78e-14	3.39e-11		GO:0001501~skeletal system development	114	1.88e-13	3.55e-10
GO:0048878~chemical homeostasis	183	4.88464e-06	0.00934959		GO:0001525~angiogenesis	69	4.15712e-06	0.007953											GO:0007409~axonogenesis	68	9.90533e-10	1.87085e-06		GO:0031327~negative regulation of cellular biosynthetic process	161	6.84325e-15	1.29452e-11		GO:0032989~cellular component morphogenesis	164	3.06e-14	5.82e-11		GO:0010604~positive regulation of macromolecule metabolic process	239	1.05e-12	1.97e-09
GO:0051174~regulation of phosphorus metabolic process	173	6.17198e-06	0.0118135		GO:0051347~positive regulation of transferase activity	102	4.52983e-06	0.008666											GO:0051094~positive regulation of developmental process	88	1.14656e-09	2.16554e-06		GO:0009890~negative regulation of biosynthetic process	163	1.06822e-14	2.00395e-11		GO:0048706~embryonic skeletal system development	51	6.12e-14	1.17e-10		GO:0001944~vasculature development	92	4.11e-12	7.75e-09
GO:0019220~regulation of phosphate metabolic process	173	6.17198e-06	0.0118135		GO:0030323~respiratory tube development	52	4.81817e-06	0.0092176											GO:0009952~anterior/posterior pattern formation	54	1.28584e-09	2.4286e-06		GO:0000902~cell morphogenesis	115	1.47791e-14	2.77667e-11		GO:0031175~neuron projection development	117	9.26e-14	1.76e-10		GO:0007167~enzyme linked receptor protein signaling pathway	115	4.93e-12	9.31e-09
GO:0001944~vasculature development	100	7.68568e-06	0.0147106		GO:0006812~cation transport	205	5.47375e-06	0.0104717											GO:0016481~negative regulation of transcription	127	1.92277e-09	3.6316e-06		GO:0048568~embryonic organ development	70	1.72826e-14	3.25628e-11		GO:0000122~negative regulation of transcription from RNA polymerase II promoter	120	9.94e-14	1.89e-10		GO:0001568~blood vessel development	90	6.05e-12	1.14e-08
GO:0051270~regulation of cell motion	80	9.91368e-06	0.0189747		GO:0070482~response to oxygen levels	66	5.60386e-06	0.0107206											GO:0048705~skeletal system morphogenesis	46	2.35022e-09	4.43894e-06		GO:0035295~tube development	82	2.26164e-14	4.25882e-11		GO:0048667~cell morphogenesis involved in neuron differentiation	101	1.36e-13	2.59e-10		GO:0007423~sensory organ development	85	6.98e-12	1.32e-08
GO:0040017~positive regulation of locomotion	47	9.9603e-06	0.0190639		GO:0001568~blood vessel development	103	5.88628e-06	0.0112609											GO:0048858~cell projection morphogenesis	79	3.41974e-09	6.45897e-06		GO:0032989~cellular component morphogenesis	123	3.56723e-14	6.70131e-11		GO:0007167~enzyme linked receptor protein signaling pathway	143	2.45e-13	4.68e-10		GO:0048705~skeletal system morphogenesis	53	7.12e-12	1.34e-08
GO:0048514~blood vessel morphogenesis	86	1.08294e-05	0.0207273		GO:0060541~respiratory system development	54	6.5665e-06	0.0125621											GO:0010629~negative regulation of gene expression	135	4.9936e-09	9.43158e-06		GO:0045449~regulation of transcription	533	4.83266e-14	9.08162e-11		GO:0006355~regulation of transcription, DNA-dependent	543	3.12e-13	5.94e-10		GO:0009952~anterior/posterior pattern formation	61	1.34e-11	2.54e-08
GO:0042325~regulation of phosphorylation	166	1.11829e-05	0.0214038		GO:0035295~tube development	95	6.58853e-06	0.0126043											GO:0051270~regulation of cell motion	65	5.68491e-09	1.07373e-05		GO:0001501~skeletal system development	105	6.97403e-14	1.31106e-10		GO:0031327~negative regulation of cellular biosynthetic process	212	3.21e-13	6.12e-10		GO:0006355~regulation of transcription, DNA-dependent	420	1.99e-11	3.75e-08
GO:0022610~biological adhesion	237	1.12943e-05	0.0216169		GO:0030030~cell projection organization	145	7.0524e-06	0.0134916											GO:0007411~axon guidance	44	7.27611e-09	1.37426e-05		GO:0007423~sensory organ development	82	7.21331e-14	1.35691e-10		GO:0009890~negative regulation of biosynthetic process	215	5.04e-13	9.6e-10		GO:0000904~cell morphogenesis involved in differentiation	89	3.48e-11	6.57e-08
GO:0010740~positive regulation of protein kinase cascade	71	1.30063e-05	0.0248932		GO:0006468~protein amino acid phosphorylation	244	7.50935e-06	0.0143657											GO:0001944~vasculature development	78	1.21998e-08	2.30421e-05		GO:0030030~cell projection organization	115	1.03273e-13	1.94156e-10		GO:0006928~cell motion	184	5.71e-13	1.09e-09		GO:0048704~embryonic skeletal system morphogenesis	34	3.74e-11	7.05e-08
GO:0007507~heart development	88	1.37112e-05	0.0262422		GO:0010033~response to organic substance	256	7.7251e-06	0.0147784											GO:0007167~enzyme linked receptor protein signaling pathway	98	1.47256e-08	2.78128e-05		GO:0048858~cell projection morphogenesis	87	1.19271e-13	2.2421e-10		GO:0051252~regulation of RNA metabolic process	551	9.34e-13	1.78e-09		GO:0051252~regulation of RNA metabolic process	425	7.23e-11	1.36e-07
GO:0007155~cell adhesion	236	1.46564e-05	0.028051		GO:0051272~positive regulation of cell motion	49	8.88179e-06	0.0169911											GO:0031327~negative regulation of cellular biosynthetic process	145	1.7425e-08	3.29112e-05		GO:0010558~negative regulation of macromolecule biosynthetic process	154	1.56871e-13	2.94986e-10		GO:0048812~neuron projection morphogenesis	100	1.16e-12	2.22e-09		GO:0048729~tissue morphogenesis	70	1.13e-10	2.13e-07
GO:0007398~ectoderm development	80	1.57316e-05	0.0301085		GO:0006793~phosphorus metabolic process	337	9.02645e-06	0.0172678											GO:0001568~blood vessel development	76	2.03487e-08	3.84334e-05		GO:0007411~axon guidance	50	3.83437e-13	7.21068e-10		GO:0045934~negative regulation of nucleobase, nucleoside, nucleotide and nucleic acid metabolic process	194	2.45e-12	4.67e-09		GO:0010605~negative regulation of macromolecule metabolic process	202	1.52e-10	2.87e-07
GO:0010942~positive regulation of cell death	156	1.6245e-05	0.0310911		GO:0006796~phosphate metabolic process	337	9.02645e-06	0.0172678											GO:0045892~negative regulation of transcription, DNA-dependent	101	2.19018e-08	4.13666e-05		GO:0048562~embryonic organ morphogenesis	57	4.32482e-13	8.13138e-10		GO:0048704~embryonic skeletal system morphogenesis	40	2.99e-12	5.69e-09		GO:0048706~embryonic skeletal system development	40	1.6e-10	3.03e-07
GO:0043068~positive regulation of programmed cell death	155	1.92157e-05	0.0367755		GO:0007169~transmembrane receptor protein tyrosine kinase signaling pathway	94	9.9412e-06	0.0190175											GO:0006928~cell motion	126	2.31507e-08	4.37254e-05		GO:0007167~enzyme linked receptor protein signaling pathway	107	5.53342e-13	1.04048e-09		GO:0010558~negative regulation of macromolecule biosynthetic process	204	3.89e-12	7.42e-09		GO:0048514~blood vessel morphogenesis	77	2.81e-10	5.29e-07
GO:0043065~positive regulation of apoptosis	154	1.96573e-05	0.0376206		GO:0001666~response to hypoxia	63	1.02098e-05	0.0195314											GO:0060541~respiratory system development	43	2.45279e-08	4.63267e-05		GO:0032990~cell part morphogenesis	88	7.00185e-13	1.31668e-09		GO:0007409~axonogenesis	92	4.85e-12	9.24e-09		GO:0032989~cellular component morphogenesis	124	3.04e-10	5.74e-07
GO:0048666~neuron development	127	2.50976e-05	0.0480299		GO:0045859~regulation of protein kinase activity	135	1.04913e-05	0.0200697											GO:0032990~cell part morphogenesis	79	3.01012e-08	5.68531e-05		GO:0045165~cell fate commitment	58	7.19572e-13	1.35301e-09		GO:0051172~negative regulation of nitrogen compound metabolic process	195	5.32e-12	1.01e-08		GO:0048666~neuron development	110	3.08e-10	5.82e-07
					GO:0043549~regulation of kinase activity	139	1.10387e-05	0.0211168											GO:0010558~negative regulation of macromolecule biosynthetic process	141	3.26435e-08	6.16549e-05		GO:0003002~regionalization	73	9.06559e-13	1.70477e-09		GO:0051094~positive regulation of developmental process	118	4.21e-11	8.02e-08		GO:0007409~axonogenesis	73	4.64e-10	8.76e-07
					GO:0001944~vasculature development	104	1.15759e-05	0.0221444											GO:0051172~negative regulation of nitrogen compound metabolic process	135	3.64822e-08	6.8905e-05		GO:0006928~cell motion	135	1.72597e-12	3.24545e-09		GO:0007242~intracellular signaling cascade	396	5.75e-11	1.1e-07		GO:0030030~cell projection organization	116	5.1e-10	9.63e-07
					GO:0000904~cell morphogenesis involved in differentiation	102	2.02137e-05	0.0386652											GO:0030323~respiratory tube development	41	3.92123e-08	7.40616e-05		GO:0035239~tube morphogenesis	53	1.06005e-11	1.9933e-08		GO:0035295~tube development	98	6.2e-11	1.18e-07		GO:0048667~cell morphogenesis involved in neuron differentiation	77	6.09e-10	1.15e-06
					GO:0015674~di-, tri-valent inorganic cation transport	77	2.23892e-05	0.0428257											GO:0048332~mesoderm morphogenesis	22	4.07863e-08	7.70345e-05		GO:0010605~negative regulation of macromolecule metabolic process	185	1.51998e-11	2.85813e-08		GO:0048732~gland development	69	6.27e-11	1.19e-07		GO:0000902~cell morphogenesis	113	9.35e-10	1.76e-06
					GO:0030182~neuron differentiation	166	2.40913e-05	0.0460809											GO:0009890~negative regulation of biosynthetic process	146	4.16708e-08	7.8705e-05		GO:0060284~regulation of cell development	72	1.93497e-11	3.63847e-08		GO:0060284~regulation of cell development	91	2.78e-10	5.3e-07		GO:0031175~neuron projection development	88	1.17e-09	2.21e-06
																			GO:0030324~lung development	40	4.9481e-08	9.34565e-05		GO:0045596~negative regulation of cell differentiation	74	3.07055e-11	5.7738e-08		GO:0048858~cell projection morphogenesis	104	6.41e-10	1.22e-06		GO:0048812~neuron projection morphogenesis	77	1.29e-09	2.44e-06
																			GO:0045934~negative regulation of nucleobase, nucleoside, nucleotide and nucleic acid metabolic process	133	4.98022e-08	9.40631e-05		GO:0001763~morphogenesis of a branching structure	37	5.85915e-11	1.10175e-07		GO:0042127~regulation of cell proliferation	261	8.29e-10	1.58e-06		GO:0045449~regulation of transcription	573	1.79e-09	3.38e-06
																			GO:0051253~negative regulation of RNA metabolic process	101	5.55274e-08	0.000104877		GO:0042127~regulation of cell proliferation	191	8.57004e-11	1.6115e-07		GO:0032990~cell part morphogenesis	107	1.04e-09	1.97e-06		GO:0060284~regulation of cell development	74	1.82e-09	3.43e-06
																			GO:0048706~embryonic skeletal system development	34	6.41376e-08	0.000121139		GO:0007242~intracellular signaling cascade	279	1.05145e-10	1.97714e-07		GO:0048729~tissue morphogenesis	81	1.19e-09	2.26e-06		GO:0045596~negative regulation of cell differentiation	76	3.26e-09	6.16e-06
																			GO:0007507~heart development	68	8.6726e-08	0.000163802		GO:0007507~heart development	73	1.1062e-10	2.08008e-07		GO:0007423~sensory organ development	96	1.25e-09	2.39e-06		GO:0035295~tube development	77	5.41e-09	1.02e-05
																			GO:0007423~sensory organ development	70	9.41543e-08	0.000177832		GO:0051056~regulation of small GTPase mediated signal transduction	81	1.4158e-10	2.66225e-07		GO:0007411~axon guidance	56	1.6e-09	3.04e-06		GO:0007411~axon guidance	46	1.27e-08	2.4e-05
																			GO:0030334~regulation of cell migration	56	1.1723e-07	0.000221416		GO:0016055~Wnt receptor signaling pathway	51	9.80847e-10	1.84437e-06		GO:0010605~negative regulation of macromolecule metabolic process	246	2.7e-09	5.15e-06		GO:0006928~cell motion	136	1.53e-08	2.88e-05
																			GO:0048514~blood vessel morphogenesis	66	1.18356e-07	0.000223542		GO:0048705~skeletal system morphogenesis	45	1.87821e-09	3.53176e-06		GO:0051960~regulation of nervous system development	84	3.18e-09	6.05e-06		GO:0006468~protein amino acid phosphorylation	179	2.37e-08	4.47e-05
																			GO:0008284~positive regulation of cell proliferation	110	1.19516e-07	0.000225733		GO:0043583~ear development	40	2.30283e-09	4.33021e-06		GO:0051056~regulation of small GTPase mediated signal transduction	103	4.24e-09	8.07e-06		GO:0048732~gland development	53	3.48e-08	6.57e-05
																			GO:0000122~negative regulation of transcription from RNA polymerase II promoter	79	1.28313e-07	0.000242348		GO:0030900~forebrain development	54	7.23205e-09	1.3599e-05		GO:0045596~negative regulation of cell differentiation	91	5.48e-09	1.04e-05		GO:0003007~heart morphogenesis	35	3.63e-08	6.86e-05
																			GO:0007498~mesoderm development	32	1.40769e-07	0.000265875		GO:0009952~anterior/posterior pattern formation	51	7.53831e-09	1.41749e-05		GO:0001944~vasculature development	102	5.63e-09	1.07e-05		GO:0016055~Wnt receptor signaling pathway	52	4.18e-08	7.89e-05
																			GO:0045597~positive regulation of cell differentiation	71	1.56972e-07	0.000296479		GO:0001944~vasculature development	76	8.81293e-09	1.65717e-05		GO:0007507~heart development	91	7.23e-09	1.38e-05		GO:0021915~neural tube development	33	4.32e-08	8.16e-05
																			GO:0001525~angiogenesis	51	1.64154e-07	0.000310043		GO:0048729~tissue morphogenesis	60	9.53321e-09	1.79261e-05		GO:0045597~positive regulation of cell differentiation	96	8.56e-09	1.63e-05		GO:0048858~cell projection morphogenesis	81	4.91e-08	9.26e-05
																			GO:0035113~embryonic appendage morphogenesis	36	1.73419e-07	0.000327541		GO:0035023~regulation of Rho protein signal transduction	40	1.35826e-08	2.55405e-05		GO:0001568~blood vessel development	99	1.32e-08	2.51e-05		GO:0051960~regulation of nervous system development	67	5.03e-08	9.5e-05
																			GO:0030326~embryonic limb morphogenesis	36	1.73419e-07	0.000327541		GO:0008284~positive regulation of cell proliferation	109	1.99299e-08	3.74758e-05		GO:0051270~regulation of cell motion	82	1.41e-08	2.7e-05		GO:0032990~cell part morphogenesis	83	8.72e-08	0.000164
																			GO:0051056~regulation of small GTPase mediated signal transduction	75	2.05523e-07	0.000388177		GO:0051960~regulation of nervous system development	62	2.11892e-08	3.98439e-05		GO:0016055~Wnt receptor signaling pathway	63	1.43e-08	2.73e-05		GO:0051270~regulation of cell motion	66	9.73e-08	0.000184
																			GO:0001707~mesoderm formation	20	4.68552e-07	0.000884967		GO:0048732~gland development	49	2.29439e-08	4.31434e-05		GO:0008284~positive regulation of cell proliferation	149	2.17e-08	4.13e-05		GO:0043583~ear development	40	1.28e-07	0.000242
																			GO:0035108~limb morphogenesis	38	6.98566e-07	0.0013194		GO:0048754~branching morphogenesis of a tube	30	4.96447e-08	9.33511e-05		GO:0010551~regulation of specific transcription from RNA polymerase II promoter	49	2.27e-08	4.33e-05		GO:0050767~regulation of neurogenesis	59	1.54e-07	0.00029
																			GO:0035107~appendage morphogenesis	38	6.98566e-07	0.0013194		GO:0050767~regulation of neurogenesis	55	5.06542e-08	9.52493e-05		GO:0050767~regulation of neurogenesis	73	2.58e-08	4.92e-05		GO:0007169~transmembrane receptor protein tyrosine kinase signaling pathway	72	3.01e-07	0.000568
																			GO:0060173~limb development	39	7.25027e-07	0.00136937		GO:0046578~regulation of Ras protein signal transduction	65	6.01577e-08	0.000113119		GO:0032583~regulation of gene-specific transcription	63	2.91e-08	5.54e-05		GO:0007517~muscle organ development	70	3.01e-07	0.000568
																			GO:0048736~appendage development	39	7.25027e-07	0.00136937		GO:0006468~protein amino acid phosphorylation	158	8.33724e-08	0.000156772		GO:0060348~bone development	59	3.49e-08	6.64e-05		GO:0009953~dorsal/ventral pattern formation	29	3.55e-07	0.000669
																			GO:0001704~formation of primary germ layer	21	7.87224e-07	0.00148685		GO:0001568~blood vessel development	72	8.39143e-08	0.000157791		GO:0030334~regulation of cell migration	73	3.51e-08	6.69e-05		GO:0045664~regulation of neuron differentiation	49	5.12e-07	0.000965
																			GO:0006468~protein amino acid phosphorylation	159	9.48786e-07	0.00179199		GO:0048839~inner ear development	33	1.15631e-07	0.000217431		GO:0035023~regulation of Rho protein signal transduction	50	3.91e-08	7.45e-05		GO:0043010~camera-type eye development	41	7.47e-07	0.00140923
																			GO:0040012~regulation of locomotion	59	1.05179e-06	0.00198654		GO:0006350~transcription	411	1.27121e-07	0.000239035		GO:0030029~actin filament-based process	95	4.07e-08	7.76e-05		GO:0051272~positive regulation of cell motion	39	7.83e-07	0.00147759
																			GO:0051216~cartilage development	31	1.06786e-06	0.00201689		GO:0030335~positive regulation of cell migration	35	1.37766e-07	0.000259053		GO:0045449~regulation of transcription	724	4.26e-08	8.11e-05		GO:0007155~cell adhesion	176	8.7e-07	0.00164108
																			GO:0000165~MAPKKK cascade	57	1.4408e-06	0.00272126		GO:0048704~embryonic skeletal system morphogenesis	27	1.40879e-07	0.000264905		GO:0007169~transmembrane receptor protein tyrosine kinase signaling pathway	90	4.76e-08	9.07e-05		GO:0048839~inner ear development	34	9.19e-07	0.0017337
																			GO:0048704~embryonic skeletal system morphogenesis	26	1.48579e-06	0.00280623		GO:0007169~transmembrane receptor protein tyrosine kinase signaling pathway	66	1.77076e-07	0.00033297		GO:0035107~appendage morphogenesis	50	5.91e-08	0.000113		GO:0022610~biological adhesion	176	9.46e-07	0.00178547
																			GO:0007369~gastrulation	29	2.36854e-06	0.00447344		GO:0051272~positive regulation of cell motion	37	2.09845e-07	0.000394588		GO:0035108~limb morphogenesis	50	5.91e-08	0.000113		GO:0051094~positive regulation of developmental process	85	9.98e-07	0.00188349
																			GO:0050679~positive regulation of epithelial cell proliferation	20	4.01289e-06	0.007579		GO:0060541~respiratory system development	40	2.21025e-07	0.000415611		GO:0030036~actin cytoskeleton organization	90	6.13e-08	0.000117		GO:0051056~regulation of small GTPase mediated signal transduction	78	1.02e-06	0.00192867
																			GO:0030029~actin filament-based process	67	5.6446e-06	0.0106606		GO:0048514~blood vessel morphogenesis	63	2.81025e-07	0.000528434		GO:0030900~forebrain development	68	6.3e-08	0.00012		GO:0030334~regulation of cell migration	57	1.16e-06	0.0021876
																			GO:0050678~regulation of epithelial cell proliferation	28	5.83699e-06	0.0110239		GO:0048706~embryonic skeletal system development	32	3.01383e-07	0.000566715		GO:0007517~muscle organ development	87	6.69e-08	0.000127		GO:0001654~eye development	47	1.64e-06	0.00309028
																			GO:0040017~positive regulation of locomotion	35	5.98286e-06	0.0112994		GO:0010941~regulation of cell death	182	3.24629e-07	0.000610426		GO:0060173~limb development	51	9.58e-08	0.000183		GO:0006796~phosphate metabolic process	232	1.94e-06	0.00366022
																			GO:0051272~positive regulation of cell motion	35	5.98286e-06	0.0112994		GO:0051094~positive regulation of developmental process	78	4.09494e-07	0.000770003		GO:0048736~appendage development	51	9.58e-08	0.000183		GO:0006793~phosphorus metabolic process	232	1.94e-06	0.00366022
																			GO:0010605~negative regulation of macromolecule metabolic process	167	6.68205e-06	0.0126199		GO:0045664~regulation of neuron differentiation	45	4.36429e-07	0.00082065		GO:0030326~embryonic limb morphogenesis	45	1.25e-07	0.000238		GO:0045665~negative regulation of neuron differentiation	19	1.98e-06	0.00373497
																			GO:0048729~tissue morphogenesis	54	9.48311e-06	0.0179096		GO:0030324~lung development	37	5.12881e-07	0.000964409		GO:0035113~embryonic appendage morphogenesis	45	1.25e-07	0.000238		GO:0007242~intracellular signaling cascade	288	2.84e-06	0.00536359
																			GO:0007243~protein kinase cascade	94	1.05821e-05	0.019985		GO:0048469~cell maturation	31	5.50614e-07	0.00103536		GO:0045664~regulation of neuron differentiation	60	1.45e-07	0.000277		GO:0035239~tube morphogenesis	46	3.28e-06	0.00619062
																			GO:0030335~positive regulation of cell migration	32	1.28737e-05	0.0243121		GO:0021953~central nervous system neuron differentiation	21	6.24718e-07	0.0011747		GO:0048514~blood vessel morphogenesis	85	1.52e-07	0.00029		GO:0043062~extracellular structure organization	55	3.32e-06	0.00626112
																			GO:0007169~transmembrane receptor protein tyrosine kinase signaling pathway	62	1.88148e-05	0.0355302		GO:0043067~regulation of programmed cell death	180	6.36157e-07	0.00119621		GO:0043583~ear development	47	1.53e-07	0.000291		GO:0032583~regulation of gene-specific transcription	48	3.56e-06	0.00671941
																			GO:0048010~vascular endothelial growth factor receptor signaling pathway	9	2.05687e-05	0.0388416		GO:0040017~positive regulation of locomotion	36	6.78604e-07	0.00127603		GO:0007155~cell adhesion	225	1.77e-07	0.000338		GO:0001704~formation of primary germ layer	21	3.71e-06	0.00699519
																			GO:0030036~actin cytoskeleton organization	62	2.19171e-05	0.0413875		GO:0016477~cell migration	76	8.13204e-07	0.00152912		GO:0022610~biological adhesion	225	2.02e-07	0.000385		GO:0007498~mesoderm development	31	4.15e-06	0.00783565
																			GO:0008285~negative regulation of cell proliferation	90	2.21689e-05	0.0418629		GO:0032583~regulation of gene-specific transcription	45	1.12671e-06	0.00211862		GO:0001503~ossification	54	3.38e-07	0.000643		GO:0042127~regulation of cell proliferation	191	4.38e-06	0.00826592
																								GO:0030323~respiratory tube development	37	1.18956e-06	0.00223681		GO:0003007~heart morphogenesis	39	3.44e-07	0.000655		GO:0030900~forebrain development	52	4.91e-06	0.00925961
																								GO:0042981~regulation of apoptosis	177	1.25578e-06	0.00236133		GO:0007243~protein kinase cascade	132	3.71e-07	0.000706		GO:0001701~in utero embryonic development	58	6.13e-06	0.0115604
																								GO:0060429~epithelium development	64	1.29195e-06	0.00242933		GO:0060541~respiratory system development	51	4.27e-07	0.000813		GO:0048332~mesoderm morphogenesis	20	6.32e-06	0.0119307
																								GO:0051216~cartilage development	30	1.40004e-06	0.00263258		GO:0034329~cell junction assembly	25	4.76e-07	0.000907		GO:0035107~appendage morphogenesis	38	7.25e-06	0.0136792
																								GO:0007155~cell adhesion	156	1.4723e-06	0.00276846		GO:0006468~protein amino acid phosphorylation	217	5.77e-07	0.0010999		GO:0035108~limb morphogenesis	38	7.25e-06	0.0136792
																								GO:0051270~regulation of cell motion	57	1.5023e-06	0.00282487		GO:0030902~hindbrain development	33	8.7e-07	0.00165812		GO:0001525~angiogenesis	50	7.35e-06	0.0138599
																								GO:0022610~biological adhesion	156	1.61747e-06	0.00304142		GO:0007044~cell-substrate junction assembly	17	8.98e-07	0.00171202		GO:0048736~appendage development	39	7.81e-06	0.0147346
																								GO:0001525~angiogenesis	47	1.9214e-06	0.00361291		GO:0016477~cell migration	103	9.72e-07	0.00185271		GO:0060173~limb development	39	7.81e-06	0.0147346
																								GO:0048736~appendage development	37	2.02851e-06	0.00381431		GO:0040012~regulation of locomotion	76	1.48e-06	0.00281559		GO:0030198~extracellular matrix organization	39	7.81e-06	0.0147346
																								GO:0060173~limb development	37	2.02851e-06	0.00381431		GO:0040007~growth	74	1.59e-06	0.00302401		GO:0002009~morphogenesis of an epithelium	38	9.48e-06	0.0178882
																								GO:0006793~phosphorus metabolic process	206	2.06615e-06	0.00388509		GO:0035239~tube morphogenesis	56	1.75e-06	0.00332853		GO:0040012~regulation of locomotion	60	1.05e-05	0.0198647
																								GO:0006796~phosphate metabolic process	206	2.06615e-06	0.00388509		GO:0051216~cartilage development	38	1.77e-06	0.00336492		GO:0030335~positive regulation of cell migration	34	1.17e-05	0.0220899
																								GO:0035107~appendage morphogenesis	36	2.07175e-06	0.00389561		GO:0046578~regulation of Ras protein signal transduction	82	1.84e-06	0.0035087		GO:0016477~cell migration	80	1.24e-05	0.0233626
																								GO:0035108~limb morphogenesis	36	2.07175e-06	0.00389561		GO:0051272~positive regulation of cell motion	45	2.78e-06	0.00530467		GO:0009968~negative regulation of signal transduction	67	1.26e-05	0.0237531
																								GO:0007498~mesoderm development	29	2.53625e-06	0.00476902		GO:0030324~lung development	46	2.88e-06	0.00548837		GO:0060537~muscle tissue development	44	1.26e-05	0.0238324
																								GO:0030334~regulation of cell migration	51	2.57693e-06	0.0048455		GO:0051674~localization of cell	110	2.9e-06	0.00552592		GO:0042471~ear morphogenesis	28	1.33e-05	0.0250946
																								GO:0045597~positive regulation of cell differentiation	65	3.13778e-06	0.00590006		GO:0048870~cell motility	110	2.9e-06	0.00552592		GO:0006350~transcription	449	1.34e-05	0.0252655
																								GO:0022604~regulation of cell morphogenesis	42	3.34931e-06	0.00629781		GO:0030323~respiratory tube development	47	2.96e-06	0.00564605		GO:0035023~regulation of Rho protein signal transduction	37	1.5e-05	0.0282752
																								GO:0051674~localization of cell	80	3.41804e-06	0.00642703		GO:0021915~neural tube development	35	3e-06	0.005717		GO:0030326~embryonic limb morphogenesis	34	1.56e-05	0.0293384
																								GO:0048870~cell motility	80	3.41804e-06	0.00642703		GO:0009953~dorsal/ventral pattern formation	32	3.16e-06	0.00602794		GO:0035113~embryonic appendage morphogenesis	34	1.56e-05	0.0293384
																								GO:0001654~eye development	42	4.18901e-06	0.00787666		GO:0034330~cell junction organization	30	3.68e-06	0.0070132		GO:0035270~endocrine system development	29	1.57e-05	0.0295758
																								GO:0043010~camera-type eye development	36	4.5179e-06	0.00849505		GO:0022604~regulation of cell morphogenesis	55	4.25e-06	0.00809059		GO:0007369~gastrulation	29	1.57e-05	0.0295758
																								GO:0030278~regulation of ossification	30	4.87393e-06	0.00916447		GO:0001656~metanephros development	26	4.47e-06	0.00851662		GO:0016310~phosphorylation	191	1.59e-05	0.030014
																								GO:0007178~transmembrane receptor protein serine/threonine kinase signaling pathway	36	5.79921e-06	0.0109042		GO:0001704~formation of primary germ layer	24	4.54e-06	0.00864198		GO:0040017~positive regulation of locomotion	36	1.82e-05	0.0343642
																								GO:0040012~regulation of locomotion	55	6.39561e-06	0.0120255		GO:0002009~morphogenesis of an epithelium	46	5.62e-06	0.0107027		GO:0060562~epithelial tube morphogenesis	28	1.86e-05	0.0350482
																								GO:0042472~inner ear morphogenesis	24	6.72436e-06	0.0126436		GO:0030198~extracellular matrix organization	47	5.7e-06	0.0108692		GO:0014706~striated muscle tissue development	42	1.89e-05	0.0356272
																								GO:0002009~morphogenesis of an epithelium	35	7.73555e-06	0.0145448		GO:0010941~regulation of cell death	250	5.84e-06	0.0111219		GO:0048870~cell motility	86	1.9e-05	0.0358264
																								GO:0002053~positive regulation of mesenchymal cell proliferation	12	8.58149e-06	0.0161353		GO:0048332~mesoderm morphogenesis	23	6.07e-06	0.0115692		GO:0051674~localization of cell	86	1.9e-05	0.0358264
																								GO:0042471~ear morphogenesis	26	1.08711e-05	0.0204399		GO:0030335~positive regulation of cell migration	41	6.85e-06	0.013056		GO:0046578~regulation of Ras protein signal transduction	64	1.92e-05	0.0362361
																								GO:0007517~muscle organ development	59	1.12956e-05	0.0212379		GO:0007498~mesoderm development	36	7.52e-06	0.0143374		GO:0060541~respiratory system development	39	2.15e-05	0.0405136
																								GO:0001709~cell fate determination	17	1.38515e-05	0.026043		GO:0048839~inner ear development	38	8.55e-06	0.0162936		GO:0045597~positive regulation of cell differentiation	69	2.24e-05	0.0422509
																								GO:0048332~mesoderm morphogenesis	18	1.83577e-05	0.0345139		GO:0060341~regulation of cellular localization	91	9e-06	0.0171442
																								GO:0010464~regulation of mesenchymal cell proliferation	12	1.88565e-05	0.0354516		GO:0043067~regulation of programmed cell death	248	9.02e-06	0.0171874
																								GO:0035113~embryonic appendage morphogenesis	31	1.90705e-05	0.0358537		GO:0032582~negative regulation of gene-specific transcription	27	9.48e-06	0.0180679
																								GO:0030326~embryonic limb morphogenesis	31	1.90705e-05	0.0358537		GO:0001525~angiogenesis	60	1.12e-05	0.0212679
																								GO:0021915~neural tube development	26	2.01174e-05	0.0378216		GO:0018108~peptidyl-tyrosine phosphorylation	26	1.3e-05	0.0247679
																								GO:0016310~phosphorylation	169	2.22856e-05	0.0418972		GO:0060537~muscle tissue development	53	1.34e-05	0.0255229
																													GO:0014706~striated muscle tissue development	51	1.39e-05	0.0264197
																													GO:0001708~cell fate specification	27	1.55e-05	0.0295622
																													GO:0001763~morphogenesis of a branching structure	36	1.61e-05	0.0306805
																													GO:0042981~regulation of apoptosis	244	1.74e-05	0.0331255
																													GO:0006793~phosphorus metabolic process	288	1.78e-05	0.0338538
																													GO:0006796~phosphate metabolic process	288	1.78e-05	0.0338538
																													GO:0046890~regulation of lipid biosynthetic process	25	1.78e-05	0.0339503
																													GO:0040017~positive regulation of locomotion	43	1.94e-05	0.0369527
																													GO:0060562~epithelial tube morphogenesis	33	1.96e-05	0.0373117
																													GO:0045860~positive regulation of protein kinase activity	82	2.21e-05	0.0420963
																													GO:0060429~epithelium development	82	2.21e-05	0.0420963
																													GO:0044057~regulation of system process	107	2.23e-05	0.0425221
																													GO:0009725~response to hormone stimulus	123	2.26e-05	0.0430015
																													GO:0051347~positive regulation of transferase activity	87	2.39e-05	0.0455247
																													GO:0001649~osteoblast differentiation	24	2.44e-05	0.0465327
																													GO:0010033~response to organic substance	218	2.54e-05	0.0483505
																													GO:0016310~phosphorylation	241	2.55e-05	0.0486114
