# Supplementary material for: DNA Methylation Landscapes of Human Fetal Development
Source: PLoS Genet. 2015 Oct 22;11(10):e1005583. doi: 10.1371/journal.pgen.1005583 (PMC4619663; doi:10.1371/journal.pgen.1005583)
Supplement: S4 Table — (XLSX) [file pgen.1005583.s010.xlsx]

## Sheet: Table S4 dDMR genes
Nearest genes of dDMRs with loss of methylation																																				Nearest genes of dDMRs with gain of methylation
Amnion									Muscle									Adrenal									Pancreas									Amnion									Muscle
Chromosome	Start	End	Nearest gene	Strand	Feature	Chrom.State Seg.	Distance to TSS		Chromosome	Start	End	Nearest gene	Strand	Feature	Chrom.State Seg.	Distance to TSS		Chromosome	Start	End	Nearest gene	Strand	Feature	Chrom.State Seg.	Distance to TSS		Chromosome	Start	End	Nearest gene	Feature	Chrom.State Seg.	Strand	Distance to TSS		Chromosome	Start	End	Nearest gene	Feature	Chrom.State Seg.	Strand	Distance to TSS		Chromosome	Start	End	Nearest gene	Strand
chr1	1079561	1079879	LOC254099	+	DS_NC	7_Enh	-7164		chr1	1022642	1022995	C1orf159	-	GB_SHO	7_Enh	28746		chr1	1478170	1479238	SSU72	-	GB_SHE	6_EnhG	31011		chr1	207095153	207095332	FAIM3	PP_NC	14_ReprPCWk	-	1260		chr1	11248185	11249057	MTOR	PP_NC	5_TxWk	-	73507		chr1	1100126	1100493	MIR200B	+
chr1	1173264	1173622	B3GALT6	+	DP_SHO	7_Enh	-5993		chr1	1144012	1144724	TNFRSF18	-	DP_SHO	7_Enh	-2653		chr1	1560531	1560894	MIB2	+	GB_CGI	6_EnhG	-10099		chr1	235099089	235099151	BC016972	IG_NC	7_Enh	-	595		chr1	16810670	16810776	CROCCP3	GB_CGI	5_TxWk	-	14976		chr1	1564422	1565541	MIB2	+
chr1	1238595	1239259	ACAP3	-	GB_SHE	7_Enh	5730		chr1	1266178	1266781	TAS1R3	+	PP_SHO	7_Enh	-87		chr1	2324205	2324396	RER1	+	PP_SHO	2_TssAFlnk	-1129		chr2	54900910	54901055	SPTBN1	DS_NC	15_Quies	+	-217633		chr1	23886730	23887816	ID3	PP_SHO	5_TxWk	-	-1531		chr1	2885085	2885168	ACTRT2	+
chr1	1266178	1266700	TAS1R3	+	PP_SHO	7_Enh	-6		chr1	1376740	1377656	VWA1	+	GB_SHO	7_Enh	-7415		chr1	2336398	2337334	PEX10	-	GB_SHE	6_EnhG	7902		chr2	192711481	192712530	SDPR	PP_NC	15_Quies	-	-549		chr1	44715942	44716296	ERI3	GB_NC	5_TxWk	-	104636		chr1	3038068	3039059	PRDM16	+
chr1	1294629	1295147	MXRA8	-	PP_SHE	7_Enh	2010		chr1	1683738	1684399	NADK	-	GB_SHO	6_EnhG	27497		chr1	24116900	24117315	LYPLA2	+	PP_SHO	7_Enh	145		chr2	202122309	202122587	CASP8	PP_NC	1_TssA	+	-24421		chr1	47693873	47695408	STIL	PP_SHO	13_ReprPC	-	84411		chr1	3099804	3100259	PRDM16	+
chr1	1357361	1358109	ANKRD65	-	PP_SHE	7_Enh	-960		chr1	1957073	1957805	GABRD	+	GB_CGI	7_Enh	-7025		chr1	37940813	37941361	ZC3H12A	+	PP_SHO	3_TxFlnk	-1208		chr2	231280698	231281474	SP100	PP_NC	1_TssA	+	-817		chr1	54821853	54822503	SSBP3	GB_CGI	15_Quies	-	56649		chr1	3276507	3276786	PRDM16	+
chr1	1369466	1369948	VWA1	+	PP_SHO	7_Enh	293		chr1	2106222	2106400	PRKCZ	+	GB_NC	2_TssAFlnk	-124491		chr1	79085250	79086197	IFI44L	+	PP_NC	2_TssAFlnk	-590		chr3	48507354	48508272	TREX1	GB_NC	1_TssA	+	-1827		chr1	87596820	87596934	LOC339524	PP_SHO	15_Quies	+	746		chr1	6531152	6531813	PLEKHG5	-
chr1	1562771	1563096	MIB2	+	GB_SHO	5_TxWk	-12301		chr1	2144873	2145276	C1orf86	-	PP_SHO	7_Enh	-1117		chr1	90309559	90309998	LRRC8D	+	GB_CGI	2_TssAFlnk	-23425		chr3	187086147	187086187	RTP4	PP_NC	1_TssA	+	-67		chr1	161049443	161049677	PVRL4	GB_CGI	7_Enh	-	9712		chr1	10764512	10764896	CASZ1	-
chr1	2063966	2064441	PRKCZ	+	GB_CGI	7_Enh	-82532		chr1	2205770	2205902	SKI	+	GB_NC	6_EnhG	-45768		chr1	118165598	118165724	FAM46C	+	GB_NC	14_ReprPCWk	-17168		chr4	140216130	140216277	NDUFC1	GB_SHO	1_TssA	-	7428		chr1	172113920	172114419	DNM3	PP_NC	15_Quies	+	-303798		chr1	12678641	12679306	DHRS3	-
chr1	2145116	2145276	C1orf86	-	PP_SHO	7_Enh	-1117		chr1	2221807	2222674	SKI	+	GB_CGI	2_TssAFlnk	-62540		chr1	161088957	161089118	NIT1	+	PP_SHO	2_TssAFlnk	-1242		chr4	186990006	186990315	TLR3	PP_NC	1_TssA	+	-9		chr1	182760143	182760900	NPL	GB_SHO	15_Quies	+	-2472		chr1	13909161	13909623	PDPN	+
chr1	8271918	8272199	SLC45A1	+	IG_CGI	7_Enh	105687		chr1	2230640	2230923	SKI	+	GB_SHO	7_Enh	-70789		chr1	202128682	202129854	PTPN7	-	PP_NC	2_TssAFlnk	862		chr5	112824646	112824746	MCC	PP_SHO	1_TssA	-	-219		chr1	203096048	203096277	ADORA1	PP_SHO	7_Enh	+	-36495		chr1	15541182	15541799	TMEM51	+
chr1	8403631	8404050	SLC45A1	+	GB_CGI	7_Enh	-26164		chr1	2251570	2252995	MORN1	-	DS_SHO	7_Enh	70151		chr1	215178601	215178907	KCNK2	+	PP_NC	2_TssAFlnk,7_Enh	211		chr5	159894937	159895160	DQ658414	DP_NC	1_TssA	+	85		chr1	203763196	203763498	ZC3H11A	PP_SHO	15_Quies	+	1284		chr1	19665131	19665757	CAPZB	-
chr1	12609308	12610104	DHRS3	-	IG_NC	7_Enh	67633		chr1	2254199	2254757	MORN1	-	GB_CGI	7_Enh	68389		chr1	241694605	241695164	KMO	+	PP_NC	1_TssA	270		chr5	176784688	176784914	RGS14	PP_NC	1_TssA	+	-76		chr1	205561806	205561906	MFSD4	GB_SHO	5_TxWk	+	-23893		chr1	23763450	23763782	ASAP3	-
chr1	17307678	17308303	MFAP2	-	PP_SHO	7_Enh	-973		chr1	2406721	2406795	PLCH2	+	PP_SHE	7_Enh	-49376		chr2	7017698	7018020	RSAD2	+	PP_NC	1_TssA	-12083		chr6	19180718	19181082	AK097585	IG_NC	15_Quies	-	-7		chr1	228075423	228075749	WNT9A	IG_CGI	7_Enh	-	59850		chr1	24646046	24646205	GRHL3	+
chr1	23521272	23521417	HTR1D	-	PP_NC	7_Enh	-195		chr1	2434487	2436214	PLCH2	+	GB_CGI	12_EnhBiv	-78795		chr2	7171869	7171998	RNF144A	+	GB_SHO	6_EnhG	-114475		chr6	30582241	30582416	PPP1R10	GB_SHE	2_TssAFlnk	-	3973		chr2	17996994	17997660	MSGN1	PP_NC	15_Quies	+	103		chr1	26484551	26485402	FAM110D	+
chr1	26611311	26611453	UBXN11	-	GB_NC	7_Enh	33401		chr1	2828044	2828198	ACTRT2	+	IG_CGI	12_EnhBiv	109848		chr2	10950511	10951250	PDIA6	-	GB_SHO	2_TssAFlnk	26853		chr6	31507857	31508167	DDX39B	GB_SHO	1_TssA	-	2058		chr2	25526696	25527080	DNMT3A	GB_NC	5_TxWk	-	38379		chr1	27686768	27687695	MAP3K6	-
chr1	27187994	27189349	BC016143	+	PP_SHO	7_Enh	-42457		chr1	2938799	2938954	ACTRT2	+	GB_CGI	14_ReprPCWk	-908		chr2	54900343	54901055	SPTBN1	+	DS_NC	7_Enh	-217633		chr6	32942710	32942808	BRD2	GB_SHO	3_TxFlnk	+	-6371		chr2	42229025	42229179	PKDCC	IG_NC	15_Quies	+	45981		chr1	27931284	27931503	AHDC1	-
chr1	28843736	28844028	RCC1	+	PP_SHO	5_TxWk	-11573		chr1	3550111	3550260	WRAP73	-	GB_NC	6_EnhG	19065		chr2	75938223	75938438	GCFC2	-	PP_SHO	2_TssAFlnk	-323		chr6	33288296	33288372	DAXX	GB_SHO	5_TxWk	-	8674		chr2	56410011	56410143	CCDC85A	PP_SHO	15_Quies	+	1115		chr1	36787932	36788416	SH3D21	+
chr1	35245692	35246223	GJB3	+	PP_SHO	7_Enh	567		chr1	4221388	4221616	LOC728716	+	IG_CGI	14_ReprPCWk	-220716		chr2	202122309	202122653	CASP8	+	PP_NC	2_TssAFlnk	-24487		chr6	33421180	33421476	SYNGAP1	PP_SHO	1_TssA	+	-33629		chr2	63271537	63272334	LOC100132215	GB_CGI	14_ReprPCWk	-	2512		chr1	40388223	40388395	MYCL1	-
chr1	40349894	40350052	TRIT1	-	PP_SHO	15_Quies	-869		chr1	6131294	6132185	KCNAB2	+	GB_CGI	7_Enh	-80659		chr2	231280698	231281474	SP100	+	PP_NC	1_TssA	-817		chr6	164506692	164506939	AK093114	IG_NC	15_Quies	+	-414056		chr2	74612020	74612222	DCTN1	PP_NC	5_TxWk	-	6992		chr1	43472373	43473978	U6	+
chr1	42384002	42384390	HIVEP3	-	PP_SHO	12_EnhBiv	117206		chr1	6615264	6615604	TAS1R1	+	PP_SHO	7_Enh	-363		chr3	15311021	15311269	SH3BP5	-	GB_NC	6_EnhG	71606		chr6	167508001	167508053	CCR6	IG_SHO	15_Quies	+	17242		chr2	100722584	100723417	AFF3	PP_SHE	13_ReprPC	-	35784		chr1	44497537	44497694	SLC6A9	-
chr1	151007925	151008971	PRUNE	+	PP_NC	5_TxWk	-28075		chr1	12609616	12610104	DHRS3	-	IG_NC	7_Enh	67633		chr3	48507354	48508272	TREX1	+	GB_NC	2_TssAFlnk	-1827		chr7	2288716	2289097	NUDT1	GB_NC	15_Quies	+	-7240		chr2	114036444	114037060	PAX8	PP_SHO	5_TxWk	-	-533		chr1	47901555	47902085	FOXD2	+
chr1	152880108	152881119	IVL	+	PP_NC	7_Enh	-98		chr1	12703864	12704007	AADACL4	+	PP_NC	14_ReprPCWk	559		chr3	114343673	114343825	ZBTB20	-	PP_NC	2_TssAFlnk	522293		chr7	2773010	2773127	GNA12	GB_SHO	5_TxWk	-	110831		chr2	121279886	121280106	LOC84931	IG_CGI	15_Quies	-	-55961		chr1	51442133	51442672	CDKN2C	+
chr1	153329781	153330257	S100A9	+	PP_NC	7_Enh	73		chr1	15655764	15656086	FHAD1	+	GB_NC	7_Enh	-82318		chr3	183894727	183894778	AP2M1	+	GB_SHO	2_TssAFlnk	-2301		chr7	75957061	75957850	YWHAG	GB_SHO	5_TxWk	-	30498		chr2	157183291	157184978	NR4A2	GB_SHO	13_ReprPC	-	13882		chr1	54562040	54562543	TCEANC2	+
chr1	153517265	153519850	AK307246	+	PP_NC	1_TssA	965		chr1	16345368	16345491	CLCNKA	+	PP_NC	7_Enh	-121		chr3	186505240	186505713	SNORA4	+	PP_SHE	6_EnhG	-312		chr7	134832544	134833166	TMEM140	PP_NC	1_TssA	+	-342		chr2	172943770	172944393	METAP1D	GB_SHO	13_ReprPC	+	-79903		chr1	59280290	59280841	LOC100131060	+
chr1	153538764	153539404	S100A2	-	PP_NC	7_Enh	962		chr1	20141662	20141781	RNF186	-	PP_NC	7_Enh	-10		chr4	1355321	1355424	UVSSA	+	GB_NC	7_Enh	-14370		chr7	135433540	135433790	FAM180A	PP_NC	15_Quies	-	-196		chr2	219735876	219736312	WNT6	GB_CGI	4_Tx	+	-11768		chr1	65467980	65468017	BC035370	-
chr1	153588927	153589781	S100A14	-	PP_NC	7_Enh	-319		chr1	32219777	32220996	BAI2	-	GB_SHO	7_Enh	9498		chr4	2696631	2696786	FAM193A	+	GB_NC	6_EnhG	-69798		chr8	37595307	37595363	ERLIN2	GB_SHO	1_TssA	+	-1246		chr2	234215965	234216562	SAG	PP_NC	15_Quies	+	-100		chr1	78511140	78511488	GIPC2	+
chr1	156253152	156254757	TMEM79	+	PP_NC	7_Enh	-2031		chr1	47655861	47656140	PDZK1IP1	-	PP_NC	7_Enh	576		chr4	99851115	99851211	EIF4E	-	PP_SHO	1_TssA	577		chr8	48647583	48648874	KIAA0146	DS_SHO	1_TssA	+	-474094		chr2	239799440	239799720	TWIST2	GB_NC	15_Quies	+	-43047		chr1	84326610	84326669	MIR548AP	+
chr1	159046773	159047034	AIM2	-	PP_NC	15_Quies	69852		chr1	54856177	54856511	SSBP3	-	GB_CGI	6_EnhG	22641		chr5	40841298	40841590	CARD6	+	PP_NC	1_TssA	-304		chr8	143085905	143086405	MIR4472-1	IG_NC	15_Quies	+	171295		chr2	239999762	239999938	HDAC4	GB_NC	5_TxWk	-	323410		chr1	87617142	87617350	LOC339524	+
chr1	159796231	159796658	SLAMF8	+	PP_NC	7_Enh	-118		chr1	79085250	79085765	IFI44L	+	PP_NC	1_TssA	-158		chr5	134181226	134181266	C5orf24	+	PP_SHO	2_TssAFlnk	104		chr8	145025059	145025128	PLEC	PP_CGI	15_Quies	-	25774		chr2	240499800	240499954	BC132948	IG_NC	15_Quies	+	41		chr1	92952702	92953279	GFI1	-
chr1	161059535	161060622	PVRL4	-	PP_NC	7_Enh	-1233		chr1	94560697	94561088	ABCA4	-	GB_NC	7_Enh	25600		chr5	140098392	140098496	VTRNA1-2	+	PP_NC	7_Enh	14		chr10	6214016	6214079	PFKFB3	GB_NC	15_Quies	+	-27198		chr3	15540137	15540665	HACL1	PP_NC	15_Quies	-	102673		chr1	110609973	110610452	ALX3	-
chr1	173176362	173176523	TNFSF4	-	PP_NC	7_Enh	-71		chr1	110166563	110166664	AMPD2	+	PP_SHE	7_Enh	-7938		chr5	148810177	148810203	MIR143	+	PP_NC	3_TxFlnk	-1722		chr10	116444240	116444463	ABLIM1	PP_NC	7_Enh	-	299		chr3	42705828	42706066	ZBTB47	GB_NC	4_Tx	+	-10890		chr1	110752047	110752307	KCNC4	+
chr1	181002976	181003203	MR1	+	GB_NC	1_TssA	-136		chr1	116311341	116311644	CASQ2	-	PP_NC	1_TssA	-242		chr5	172195602	172196746	DUSP1	-	GB_SHO	3_TxFlnk	1452		chr10	134420036	134420208	INPP5A	GB_NC	15_Quies	+	-68884		chr3	128209772	128210541	GATA2	GB_CGI	13_ReprPC	-	1487		chr1	119535693	119536064	TBX15	-
chr1	193155208	193155390	CDC73	+	PP_NC	7_Enh	-64243		chr1	151148231	151148689	TMOD4	-	PP_NC	3_TxFlnk	71		chr6	17988677	17988937	KIF13A	-	PP_SHO	2_TssAFlnk	-1083		chr11	192096	192996	SCGB1C1	PP_NC	14_ReprPCWk	+	84		chr4	901785	902074	GAK	GB_SHO	4_Tx	-	24087		chr1	151104186	151105049	SEMA6C	-
chr1	209600926	209602002	MIR205HG	+	PP_NC	7_Enh	163		chr1	151826123	151826205	THEM5	-	PP_NC	13_ReprPC	-32		chr6	25138551	25138951	CMAHP	-	PP_SHO	1_TssA	27842		chr11	796069	796569	SLC25A22	PP_SHO	1_TssA	-	1747		chr4	1167230	1167714	SPON2	PP_SHO	13_ReprPC	-	35036		chr1	154732993	154733492	KCNN3	-
chr1	209825731	209825856	LAMB3	-	PP_NC	1_TssA	-45		chr1	153538406	153539397	S100A2	-	PP_NC	7_Enh	969		chr6	26364728	26365194	BTN3A2	+	PP_NC	7_Enh	193		chr11	67325980	67326023	GSTP1	IG_NC	14_ReprPCWk	+	25043		chr4	7301176	7301854	SORCS2	GB_NC	15_Quies	+	-107589		chr1	155044309	155044345	EFNA3	+
chr1	227962793	227963171	SNAP47	+	GB_NC	7_Enh	-46931		chr1	153762201	153762372	SLC27A3	+	IG_NC	7_Enh	-15542		chr6	30707619	30708009	FLOT1	-	GB_SHE	6_EnhG	2501		chr12	55378621	55378654	TESPA1	PP_NC	14_ReprPCWk	-	-124		chr4	20884321	20884431	KCNIP4	PP_NC	15_Quies	-	1065991		chr1	156046546	156047509	MEX3A	-
chr1	234667087	234667500	LOC100506795	-	PP_NC	7_Enh	25		chr1	154832235	154833121	KCNN3	-	PP_NC	7_Enh	9635		chr6	30737068	30737270	IER3	-	IG_NC	7_Enh	-24939		chr12	56113808	56114269	RDH5	PP_SHE	5_TxWk	+	-118		chr4	41361623	41361919	LIMCH1	PP_SHO	7_Enh	+	-295		chr1	159825552	159825761	VSIG8	-
chr1	234743527	234743830	IRF2BP2	-	GB_SHO	3_TxFlnk	1441		chr1	160336475	160336699	NHLH1	+	PP_NC	7_Enh	158		chr6	31507785	31508167	DDX39B	-	GB_SHO	3_TxFlnk	2058		chr12	113416061	113416290	OAS2	PP_NC	1_TssA,14_ReprPCWk	+	-90		chr4	95264019	95264127	HPGDS	PP_NC	15_Quies	-	-100		chr1	165324100	165324679	LMX1A	-
chr2	1820169	1821101	MYT1L	-	GB_NC	7_Enh	513931		chr1	161168889	161169164	NDUFS2	+	PP_SHE	2_TssAFlnk	-2270		chr6	31527707	31527920	NFKBIL1	+	DS_NC	6_EnhG	-13273		chr13	108922032	108922274	TNFSF13B	PP_NC	1_TssA	+	-18686		chr4	119948360	119948542	SYNPO2	GB_NC	15_Quies	+	-138546		chr1	165326327	165327005	LMX1A	-
chr2	3260677	3261367	TSSC1	-	GB_NC	15_Quies	120286		chr1	205631978	205632101	SLC45A3	-	GB_CGI	7_Enh	17486		chr6	31626937	31627126	C6orf47	-	GB_SHO	3_TxFlnk	1423		chr13	114103452	114103646	ADPRHL1	PP_NC	1_TssA	-	4193		chr4	151502935	151504138	LRBA	PP_SHO	13_ReprPC	-	432741		chr1	167090646	167091161	DUSP27	+
chr2	30371990	30373187	YPEL5	+	GB_SHO	5_TxWk,7_Enh	-3380		chr1	226129561	226130366	LEFTY2	-	PP_SHE	7_Enh	-1177		chr6	31627617	31627711	C6orf47	-	GB_SHO	2_TssAFlnk	838		chr14	56045894	56046098	KTN1-AS1	PP_SHO	1_TssA	-	730		chr4	174429263	174430141	HAND2	IG_SHO	5_TxWk	-	21239		chr1	167598521	167598993	RCSD1	+
chr2	65593908	65594021	SPRED2	-	PP_NC	7_Enh	65750		chr1	230457631	230457979	PGBD5	-	GB_NC	7_Enh	103496		chr6	31743820	31743961	VWA7	-	GB_NC	15_Quies	1147		chr14	100203942	100204258	EML1	IG_CGI	10_TssBiv	+	-228		chr4	174431730	174432425	HAND2	IG_SHO	5_TxWk	-	18955		chr1	170628856	170630397	PRRX1	+
chr2	85637116	85638053	CAPG	-	PP_SHE	7_Enh	7502		chr1	244318867	244319093	ZBTB18	+	IG_NC	7_Enh	-104508		chr6	31937582	31937973	DOM3Z	-	PP_SHO	6_EnhG	2059		chr15	41061527	41062017	DNAJC17	PP_NC	5_TxWk	-	37658		chr4	174452461	174453287	NBLA00301	GB_SHO	5_TxWk	+	-852		chr1	174843754	174844490	RABGAP1L	+
chr2	102803290	102803435	IL1RL2	+	PP_SHO	7_Enh	-2		chr2	794683	795273	LOC339822	-	GB_NC	7_Enh	68839		chr6	32011506	32011583	TNXB	-	GB_NC	5_TxWk	71528		chr16	11835360	11835562	TXNDC11	GB_SHO	1_TssA	-	1172		chr4	174456504	174458819	NBLA00301	GB_SHO	5_TxWk	+	-4895		chr1	175856781	175857788	RFWD2	-
chr2	113875226	113875512	IL1RN	+	PP_NC	7_Enh	-10721		chr2	1647185	1647260	PXDN	-	GB_NC	6_EnhG	101364		chr6	32151394	32151517	AGER	-	GB_NC	6_EnhG	584		chr16	30379391	30380183	TBC1D10B	GB_SHO	1_TssA	-	1402		chr4	186741362	186741887	SORBS2	GB_NC	15_Quies	-	135919		chr1	183154981	183155644	LAMC2	+
chr2	128458240	128458556	SFT2D3	+	PP_SHO	7_Enh	41		chr2	6072744	6072933	LOC150622	+	PP_NC	12_EnhBiv	75		chr6	32942710	32942808	BRD2	+	GB_SHO	3_TxFlnk	-6371		chr17	2907678	2908068	RAP1GAP2	GB_NC	5_TxWk	+	-227718		chr4	188953178	188953969	ZFP42	IG_NC	15_Quies	+	-37044		chr1	201368914	201369031	LAD1	-
chr2	231191662	231191916	SP140L	+	PP_NC	7_Enh	-17		chr2	26700914	26701355	OTOF	-	PP_NC	7_Enh	80211		chr6	33247084	33247250	WDR46	-	GB_SHO	6_EnhG	10054		chr17	72442928	72443066	GPRC5C	GB_CGI	5_TxWk	+	-22076		chr5	3605954	3607063	IRX1	IG_CGI	7_Enh	+	-10895		chr1	201707751	201708522	NAV1	+
chr2	231280698	231281474	SP100	+	PP_NC	1_TssA	-817		chr2	27371818	27371891	TCF23	+	PP_SHO	14_ReprPCWk	-19		chr6	33248546	33248687	WDR46	-	GB_SHE	4_Tx	8617		chr17	78237117	78237543	RNF213	GB_SHE	1_TssA	+	-2878		chr5	14487268	14488255	TRIO	GB_CGI	4_Tx	+	-344444		chr1	201709336	201709675	NAV1	+
chr2	235934945	235936477	SH3BP4	+	GB_NC	7_Enh	-75860		chr2	69665094	69665232	NFU1	-	PP_SHO	2_TssAFlnk	-472		chr6	33288296	33288372	DAXX	-	GB_SHO	6_EnhG	8674		chr19	1270330	1271275	CIRBP	PP_SHO	1_TssA	+	-11891		chr5	32709071	32709396	NPR3	DP_SHO	15_Quies	+	-20220		chr1	201979499	201979938	ELF3	+
chr2	239195537	239196219	PER2	-	GB_SHO	7_Enh	2524		chr2	86255119	86255654	POLR1A	-	GB_NC	6_EnhG	77624		chr6	169624722	169625604	THBS2	-	GB_SHE	7_Enh	28535		chr19	2085297	2085483	MOB3A	GB_NC	15_Quies	-	11189		chr5	43044703	43045555	LOC153684	GB_SHO	13_ReprPC	+	-3026		chr1	210407588	210407973	SERTAD4	+
chr2	241390143	241391057	GPC1	+	GB_SHO	7_Enh	-15969		chr2	128158853	128159058	PROC	+	IG_CGI	2_TssAFlnk	16945		chr7	922165	923984	GET4	+	GB_NC	7_Enh	-7795		chr19	56187475	56188459	EPN1	PP_SHO	2_TssAFlnk	+	-1867		chr5	92914036	92914319	NR2F1-AS1	GB_SHO	14_ReprPCWk	-	7035		chr1	214158573	214159610	PROX1	+
chr2	241835462	241836501	C2orf54	-	PP_NC	7_Enh	-195		chr2	128438947	128439345	LIMS2	-	PP_NC	2_TssAFlnk	15		chr7	5271516	5272275	WIPI2	+	GB_SHE	6_EnhG	-42456		chr20	11898478	11899258	BTBD3	PP_NC	1_TssA	+	-27887		chr5	139490895	139492535	PURA	DP_SHO	5_TxWk	+	-5173		chr1	217306590	217306763	ESRRG	-
chr2	242499464	242499542	BOK	+	PP_SHO	1_TssA	-1406		chr2	201342532	201342647	SPATS2L	+	GB_NC	6_EnhG	-172043		chr7	102109095	102109446	LRWD1	+	GB_SHE	6_EnhG	-4070		chr20	56136012	56136167	PCK1	PP_NC	15_Quies	+	-31		chr5	150018914	150019496	SYNPO	PP_NC	7_Enh	+	-38854		chr1	217309794	217310918	ESRRG	-
chr3	3080327	3080621	CNTN4	+	GB_NC	7_Enh	-940124		chr2	218770208	218770270	TNS1	-	GB_NC	6_EnhG	97448		chr7	134832671	134833299	TMEM140	+	PP_NC	1_TssA	-475		chr20	56323934	56324226	AK056098	IG_CGI	14_ReprPCWk	+	-38695		chr6	1615843	1617377	FOXC1	DS_SHO	13_ReprPC	+	-6696		chr1	217311608	217312478	ESRRG	-
chr3	9943828	9943937	CIDEC	-	PP_NC	7_Enh	-21999		chr2	219696472	219697934	PRKAG3	-	PP_NC	2_TssAFlnk	-1125		chr7	150264311	150264987	GIMAP4	+	PP_NC	1_TssA	-622		chr21	38580484	38580812	DSCR9	PP_NC	15_Quies	+	-8		chr6	10381196	10383147	TFAP2A	IG_SHO	15_Quies	-	36745		chr1	221049931	221052023	HLX	+
chr3	15311021	15311269	SH3BP5	-	GB_NC	15_Quies	71606		chr2	234369787	234370070	DGKD	+	GB_CGI	6_EnhG	-106917		chr7	154719693	154720452	LOC100132707	+	PP_NC	1_TssA	-225		chr22	24979367	24979588	GGT1	PP_NC	15_Quies	+	130		chr6	10385489	10386160	TFAP2A	IG_SHO	14_ReprPCWk	-	33732		chr1	221053904	221054825	HLX	+
chr3	48507354	48507618	TREX1	+	GB_NC	6_EnhG	-1173		chr2	239169537	239169696	PER2	-	GB_NC	6_EnhG	29047		chr8	1906312	1906498	ARHGEF10	+	GB_NC	7_Enh	-134356		chr22	26875499	26876075	HPS4	PP_SHE	1_TssA	-	3728		chr6	10390961	10391412	TFAP2A	IG_CGI	15_Quies	-	28480		chr1	221057236	221058805	HLX	+
chr3	50304406	50304463	SEMA3B	+	PP_NC	2_TssAFlnk	527		chr2	240234376	240234604	HDAC4	-	GB_NC	7_Enh	88744		chr8	20107455	20107758	LZTS1	-	GB_CGI	6_EnhG	53716		chr22	41763093	41763280	TEF	PP_NC	1_TssA	+	57		chr6	10422139	10422636	TFAP2A	DP_CGI	14_ReprPCWk	-	-2744		chr1	221060360	221060851	HLX	+
chr3	56810151	56810749	ARHGEF3	-	PP_NC	5_TxWk	302608		chr2	242499464	242499542	BOK	+	PP_SHO	2_TssAFlnk	-1406		chr8	145024929	145025064	PLEC	-	PP_CGI	2_TssAFlnk	25838		chr22	46473039	46473343	MIRLET7BHG	DP_NC	1_TssA	+	-23313		chr6	10520874	10521309	GCNT2	PP_NC	15_Quies	+	-28853		chr1	225864873	225865487	AK124056	+
chr3	128292699	128292922	C3orf27	-	GB_NC	15_Quies	2007		chr2	242665153	242665958	ING5	+	GB_SHO	6_EnhG	-24508		chr8	145596918	145597148	ADCK5	+	PP_SHO	7_Enh	-358		chr22	50720288	50721368	PLXNB2	GB_CGI	5_TxWk	-	24688		chr6	13428522	13428657	GFOD1	GB_NC	15_Quies	-	59237		chr1	225998730	225999183	EPHX1	+
chr3	193489034	193489233	AK091265	-	IG_NC	15_Quies	72580		chr2	242751796	242752080	NEU4	+	PP_SHE	7_Enh	-2160		chr9	35563312	35564052	FAM166B	-	PP_NC	2_TssAFlnk	-156											chr6	14282571	14283006	CD83	IG_NC	14_ReprPCWk	+	-165134		chr1	243637838	243638141	SDCCAG8	+
chr3	196065289	196065688	TM4SF19	-	PP_NC	7_Enh	-314		chr2	242801896	242802192	PDCD1	-	PP_SHE	2_TssAFlnk	-1132		chr9	139617442	139617752	SNHG7	-	GB_SHO	6_EnhG	4884											chr6	27525678	27526176	TRNA_Arg	IG_NC	14_ReprPCWk	+	-1225773		chr2	1821733	1822412	MYT1L	-
chr4	671543	671851	MYL5	+	PP_SHE	5_TxWk	-4482		chr3	11178593	11178798	HRH1	+	PP_NC	12_EnhBiv	-19		chr10	3149673	3149852	PFKP	+	GB_SHO	6_EnhG	-41327											chr6	29589895	29591016	GABBR1	GB_NC	4_Tx	-	10737		chr2	10444757	10445016	HPCAL1	+
chr4	681086	681440	MFSD7	-	GB_SHO	7_Enh	1790		chr3	11610142	11610595	VGLL4	-	PP_CGI	6_EnhG	151625		chr10	73976790	73976821	ANAPC16	+	PP_SHO	1_TssA	-1034											chr6	30175074	30175305	TRIM26	GB_NC	5_TxWk	-	5899		chr2	10688100	10688317	NOL10	-
chr4	3288101	3288648	RGS12	+	IG_NC	7_Enh	6107		chr3	32509018	32509105	CMTM7	+	IG_SHO	2_TssAFlnk	-75942		chr10	88414235	88414321	OPN4	+	PP_NC	7_Enh	-7											chr6	30956214	30956796	MUC21	GB_NC	15_Quies	+	-5301		chr2	25427350	25427652	DNMT3A	-
chr4	6695319	6695614	S100P	+	PP_NC	7_Enh	-818		chr3	38009934	38010902	MIR26A1	+	PP_NC	6_EnhG	-7		chr10	91061115	91061902	IFIT2	+	PP_NC	1_TssA	-190											chr6	31786747	31786808	AK298056	DP_SHO	5_TxWk	-	-1025		chr2	42229025	42229179	PKDCC	+
chr4	7813475	7814047	AFAP1	-	GB_NC	7_Enh	127606		chr3	39234137	39235366	XIRP1	-	PP_NC	7_Enh	-1279		chr10	133767956	133768054	PPP2R2D	+	GB_NC	6_EnhG	-20099											chr6	32038462	32038747	TNXB	GB_NC	4_Tx	-	44364		chr2	43295303	43295753	ZFP36L2	-
chr4	8395941	8396502	ACOX3	-	GB_NC	7_Enh	45948		chr3	42694144	42695035	ZBTB47	+	PP_SHO	2_TssAFlnk	141		chr11	498864	498943	RNH1	-	GB_SHE	6_EnhG	8357											chr6	32063595	32063991	TNXB	GB_CGI	4_Tx	-	19120		chr2	45158510	45159972	SIX3	+
chr4	38859706	38859770	TLR6	-	PP_NC	7_Enh	-1332		chr3	42699933	42700585	ZBTB47	+	GB_CGI	6_EnhG	-5409		chr11	2481641	2482401	KCNQ1	+	PP_NC	7_Enh	-16487											chr6	32064146	32064218	TNXB	GB_CGI	4_Tx	-	18893		chr2	45170322	45171097	SIX3	+
chr4	42122106	42122161	BEND4	-	GB_NC	15_Quies	32734		chr3	42743794	42744889	HHATL	-	PP_NC	2_TssAFlnk,7_Enh	-570		chr11	10590003	10590587	MRVI1-AS1	+	PP_NC	7_Enh	-27768											chr6	32064508	32064923	TNXB	GB_CGI	4_Tx	-	18188		chr2	45172201	45173548	SIX3	+
chr4	99851008	99851281	EIF4E	-	PP_SHO	1_TssA	507		chr3	48507385	48508272	TREX1	+	GB_NC	2_TssAFlnk	-1827		chr11	58911067	58912052	FAM111A	+	PP_SHO	2_TssAFlnk	-1831											chr6	34206400	34206683	HMGA1	PP_SHO	7_Enh	+	-2033		chr2	45175881	45176551	SIX3	+
chr4	100737821	100738139	DAPP1	+	PP_NC	1_TssA,5_TxWk	-149		chr3	58563269	58563693	FAM107A	-	PP_NC	7_Enh	49644		chr11	62456939	62457345	LRRN4CL	-	PP_SHO	6_EnhG	26											chr6	50803820	50804147	TFAP2B	GB_NC	5_TxWk	+	-17711		chr2	45177632	45178953	SIX3	+
chr4	184908351	184908573	STOX2	+	GB_NC	15_Quies	-133989		chr3	114343673	114343825	ZBTB20	-	PP_NC	2_TssAFlnk	522293		chr11	71710614	71711087	IL18BP	+	PP_NC	6_EnhG	-1500											chr6	50814011	50814305	TFAP2B	GB_SHO	12_EnhBiv	+	-27869		chr2	45227645	45229171	SIX2	-
chr4	186877497	186877657	SORBS2	-	PP_NC	15_Quies	149		chr3	119379414	119379792	POPDC2	-	PP_NC	2_TssAFlnk,7_Enh	4379		chr11	72433059	72433866	ARAP1	-	PP_NC	2_TssAFlnk	70778											chr6	100893665	100895618	SIM1	GB_SHO	13_ReprPC	-	17187		chr2	45238678	45240373	SIX2	-
chr4	187622081	187623048	FAT1	-	GB_NC	7_Enh	24828		chr3	123339334	123339568	MYLK	-	PP_NC	7_Enh	263610		chr11	75898132	75898203	WNT11	-	GB_NC	6_EnhG	23577											chr6	100895907	100897309	SIM1	GB_CGI	13_ReprPC	-	15496		chr2	54087189	54087552	ASB3	-
chr5	672845	672910	TPPP	-	GB_NC	7_Enh	20600		chr3	125820459	125821264	SLC41A3	-	PP_NC	7_Enh	-860		chr13	52734018	52734071	NEK3	-	PP_SHO	2_TssAFlnk	-75											chr6	167507762	167508191	CCR6	IG_SHO	5_TxWk	+	17104		chr2	56409774	56410143	CCDC85A	+
chr5	1514077	1514608	LPCAT1	-	GB_NC	7_Enh	9484		chr3	128292314	128292922	C3orf27	-	GB_NC	14_ReprPCWk	2007		chr13	113461305	113462045	ATP11A	+	GB_SHE	6_EnhG	-117402											chr6	169026695	169027033	SMOC2	GB_NC	15_Quies	+	-185202		chr2	60763357	60763808	BCL11A	-
chr5	3853654	3854732	IRX1	+	IG_SHO	7_Enh	-258564		chr3	128295084	128295141	C3orf27	-	PP_NC	7_Enh	-212		chr13	113622738	113622750	MCF2L-AS1	-	PP_CGI	2_TssAFlnk	388											chr7	736792	737039	PRKAR1B	GB_NC	15_Quies	-	30248		chr2	63270824	63272334	LOC100132215	-
chr5	10308246	10309123	CMBL	-	PP_SHO	5_TxWk	-985		chr3	129160135	129161504	IFT122	+	PP_SHO	2_TssAFlnk,7_Enh	-2536		chr14	24600500	24601001	FITM1	+	PP_SHO	7_Enh	-517											chr7	4746837	4747261	FOXK1	GB_NC	5_TxWk	+	-63873		chr2	63279495	63280625	OTX1	+
chr5	112824614	112825132	MCC	-	PP_SHO	7_Enh	-605		chr3	155394109	155394428	PLCH1	-	PP_NC	15_Quies	68428		chr14	35871715	35872393	NFKBIA	-	GB_SHO	3_TxFlnk	1562											chr7	4778839	4779225	FOXK1	GB_NC	5_TxWk	+	-95837		chr2	66672841	66673985	MEIS1	+
chr5	118691007	118691126	TNFAIP8	+	PP_SHO	7_Enh	-86739		chr3	189348936	189349021	TP63	+	PP_NC	1_TssA	184		chr14	39734964	39735496	CTAGE5	+	PP_SHO	2_TssAFlnk	-1008											chr7	6693030	6693838	DQ594582	IG_CGI	4_Tx	+	-659		chr2	71131201	71134190	VAX2	+
chr5	138861832	138862441	TMEM173	-	PP_NC	7_Enh	79		chr4	671489	671851	MYL5	+	PP_SHE	7_Enh	-4482		chr14	100203730	100204528	EML1	+	IG_CGI	11_BivFlnk	-498											chr7	25897590	25898688	RNU6-16P	IG_CGI	13_ReprPC	-	62447391		chr2	74210857	74210960	TET3	+
chr5	172195602	172196746	DUSP1	-	GB_SHO	5_TxWk	1452		chr4	680338	681440	MFSD7	-	GB_SHO	7_Enh	1790		chr14	105714379	105714404	BRF1	-	PP_SHO	2_TssAFlnk	67522											chr7	26897202	26897714	SKAP2	GB_NC	7_Enh	-	137144		chr2	74668976	74669380	RTKN	-
chr5	176522511	176523370	FGFR4	+	GB_SHE	7_Enh	-9483		chr4	719614	720809	PCGF3	+	GB_SHE	7_Enh	-21272		chr15	40750913	40751171	BAHD1	+	GB_NC	6_EnhG	-19251											chr7	27188364	27188770	DQ655986	PP_SHO	13_ReprPC	-	3447		chr2	97204401	97205147	ARID5A	+
chr6	10434761	10434975	LINC00518	-	PP_NC	7_Enh	132		chr4	734600	734746	PCGF3	+	GB_SHE	6_EnhG	-35209		chr15	77988506	77988841	LINGO1	-	IG_NC	12_EnhBiv	124401											chr7	55979688	55980196	ZNF713	PP_NC	15_Quies	+	-25027		chr2	100722155	100723417	AFF3	-
chr6	17988677	17988937	KIF13A	-	PP_SHO	1_TssA,7_Enh	-1083		chr4	867560	868376	GAK	-	GB_SHE	6_EnhG	57785		chr15	99250527	99251007	IGF1R	+	GB_CGI	6_EnhG	-58807											chr7	97935666	97935764	BAIAP2L1	GB_NC	5_TxWk	-	94616		chr2	102091195	102091321	RFX8	-
chr6	19180718	19181082	AK097585	-	IG_NC	15_Quies	-7		chr4	1027885	1028067	FGFRL1	+	IG_CGI	7_Enh	-24343		chr16	701833	702600	WDR90	+	GB_SHO	6_EnhG	-3289											chr7	105319437	105319679	ATXN7L1	PP_NC	15_Quies	-	197371		chr2	111875858	111876361	ACOXL	+
chr6	25138416	25138632	CMAHP	-	PP_SHO	7_Enh	28161		chr4	1029410	1029654	FGFRL1	+	IG_CGI	7_Enh	-25930		chr16	2082689	2083393	TCRBV20S1	-	PP_SHE	2_TssAFlnk	89700											chr7	142659378	142660200	KEL	PP_NC	15_Quies	-	-432		chr2	114035983	114037060	PAX8	-
chr6	26364728	26365194	BTN3A2	+	PP_NC	15_Quies	193		chr4	1201588	1202599	LOC100130872	-	GB_SHO	7_Enh	151		chr16	3115053	3115286	IL32	+	PP_NC	7_Enh	12											chr7	150104705	150105086	LOC728743	GB_CGI	5_TxWk	+	-6915		chr2	121223909	121224327	LOC84931	-
chr6	30850913	30851086	DDR1	+	PP_SHO	2_TssAFlnk	-6888		chr4	1202780	1203168	SPON2	-	PP_CGI	7_Enh	-418		chr16	3559551	3559687	CLUAP1	+	PP_NC	4_Tx	-8763											chr8	29732519	29732579	LOC286135	IG_NC	5_TxWk	+	46450		chr2	121496398	121497334	GLI2	+
chr6	31088188	31089293	CDSN	-	PP_NC	7_Enh	-1070		chr4	1204956	1206150	CTBP1	-	GB_CGI	6_EnhG	37591		chr16	29819931	29820592	BOLA2	-	GB_SHO	6_EnhG	-354307											chr8	30300142	30300306	RBPMS	GB_NC	15_Quies	+	-58362		chr2	157183755	157184978	NR4A2	-
chr6	31543289	31543686	TNF	+	PP_NC	1_TssA	-342		chr4	1208699	1208960	CTBP1	-	GB_SHO	6_EnhG	34781		chr16	30379391	30380183	TBC1D10B	-	GB_SHO	2_TssAFlnk,3_TxFlnk	1402											chr8	37556386	37556959	ZNF703	DS_SHO	14_ReprPCWk	+	-3690		chr2	172944338	172945698	METAP1D	+
chr6	31590513	31590870	SNORA38	+	PP_SHO	7_Enh	-14		chr4	1244006	1244086	C4orf42	+	PP_CGI	2_TssAFlnk	-726		chr16	50745944	50746063	NOD2	+	GB_NC	7_Enh	-18549											chr8	37657824	37658755	GPR124	GB_SHE	14_ReprPCWk	+	-17046		chr2	175197693	175199349	SP9	+
chr6	31687914	31689996	LY6G6C	-	GB_SHE	7_Enh	-374		chr4	3371236	3371520	RGS12	+	PP_SHE	7_Enh	-76765		chr16	56640057	56641373	MT2A	+	DP_SHO	7_Enh	738											chr8	49469560	49470468	EFCAB1	IG_SHO	15_Quies	-	177402		chr2	175209075	175210231	CIR1	-
chr6	31692234	31692375	C6orf25	+	GB_SHO	5_TxWk	-6004		chr4	6344361	6344484	PPP2R2C	-	GB_NC	14_ReprPCWk	220843		chr16	67517429	67517841	AGRP	-	PP_SHE	7_Enh	-125											chr8	49493865	49494724	EFCAB1	IG_NC	5_TxWk	-	153146		chr2	202814226	202814523	CDK15	+
chr6	31744339	31744545	VWA7	-	GB_NC	7_Enh	563		chr4	8345155	8346274	AX746755	-	IG_SHO	7_Enh	12829		chr16	88767124	88767723	RNF166	-	GB_SHE	3_TxFlnk	5106											chr8	77618770	77618893	ZFHX4	GB_NC	15_Quies	+	-25439		chr2	202901045	202901470	FZD7	+
chr6	31760593	31760825	VARS	-	GB_SHE	5_TxWk	2905		chr4	8372691	8372840	ACOX3	-	GB_SHE	6_EnhG	69610		chr17	907643	908923	ABR	-	GB_SHE	6_EnhG	223392											chr8	129061048	129061665	MIR1207	PP_NC	15_Quies	+	-267		chr2	218898511	218898788	RUFY4	+
chr6	32014381	32014674	TNXB	-	PP_NC	4_Tx	68437		chr4	8395941	8396502	ACOX3	-	GB_NC	6_EnhG	45948		chr17	1553415	1553591	RILP	-	PP_SHO	3_TxFlnk	-220											chr8	144809621	144810657	FAM83H	GB_CGI	4_Tx	-	5314		chr2	220312854	220313972	SPEG	+
chr6	32043561	32043739	TNXB	-	GB_SHE	6_EnhG	39372		chr4	54424280	54424596	PDGFRA	+	PP_NC	7_Enh	670668		chr17	2907678	2908068	RAP1GAP2	+	GB_NC	12_EnhBiv,2_TssAFlnk	-227718											chr9	34370781	34370894	KIAA1161	GB_CGI	5_TxWk	-	5957		chr2	220348312	220348803	SPEG	+
chr6	32050905	32051108	TNXB	-	GB_SHE	5_TxWk	32003		chr4	87770586	87770782	SLC10A6	-	PP_NC	15_Quies	-366		chr17	6659326	6659562	XAF1	+	PP_NC	11_BivFlnk	-796											chr10	4193830	4193914	AK055803	IG_NC	15_Quies	+	-99912		chr2	223156901	223160569	PAX3	-
chr6	32054441	32055068	TNXB	-	GB_SHO	7_Enh	28043		chr4	100571622	100574653	AL832378	-	IG_CGI	2_TssAFlnk	-8		chr17	27048708	27049656	SNORD4A	+	PP_SHO	6_EnhG	-56											chr10	8088801	8090162	GATA3-AS1	DP_SHE	7_Enh	-	5285		chr2	223161771	223162128	PAX3	-
chr6	32074291	32074934	ATF6B	-	GB_NC	5_TxWk,7_Enh	21096		chr4	100576610	100576985	AL832378	-	IG_SHE	7_Enh	-4996		chr17	47093955	47094252	IGF2BP1	+	GB_SHO	7_Enh	-19478											chr10	21796152	21798698	SKIDA1	DS_CGI	5_TxWk	-	15913		chr2	223164459	223165320	CCDC140	+
chr6	32077744	32078624	ATF6B	-	PP_NC	6_EnhG	17406		chr4	177190277	177190325	ASB5	-	PP_NC	1_TssA	8397		chr17	65040527	65040616	CACNG1	+	PP_SHO	12_EnhBiv	90											chr10	28970534	28971331	BAMBI	GB_SHE	6_EnhG	+	-5060		chr2	223165891	223167170	CCDC140	+
chr6	32081263	32083628	ATF6B	-	DP_NC	7_Enh	12402		chr4	184938291	184938359	STOX2	+	GB_NC	7_Enh	-163775		chr17	75180760	75181254	SEC14L1	+	PP_NC	7_Enh	-98456											chr10	48416781	48416966	GDF2	PP_SHE	15_Quies	-	-113		chr2	231733948	231735037	ITM2C	+
chr6	32782796	32783347	HLA-DOB	-	GB_NC	7_Enh	1478		chr4	186990006	186990315	TLR3	+	PP_NC	1_TssA	-9		chr17	76976245	76976357	LGALS3BP	-	PP_NC	2_TssAFlnk	-166											chr10	73479696	73479848	CDH23	PP_NC	15_Quies	+	-323157		chr2	236716219	236716372	AGAP1	+
chr6	32805142	32805554	TAP2	-	GB_SHO	7_Enh	1003		chr4	187621327	187622164	FAT1	-	GB_NC	7_Enh	25712		chr17	78161467	78161572	CARD14	+	PP_SHE	7_Enh	-17781											chr10	75410817	75411501	SYNPO2L	PP_SHE	15_Quies	-	12060		chr2	236923322	236923534	AGAP1	+
chr6	33129988	33130034	COL11A2	-	DS_SHO	15_Quies	30242		chr5	191127	191486	LRRC14B	+	PP_SHO	11_BivFlnk	140		chr17	80401500	80402891	C17orf62	-	GB_CGI	6_EnhG	5814											chr10	90712684	90712948	ACTA2	PP_NC	15_Quies	-	38199		chr2	238599734	238599858	LRRFIP1	+
chr6	33246091	33246185	B3GALT4	+	GB_SHO	7_Enh	-1268		chr5	850745	851225	ZDHHC11	-	PP_SHE	12_EnhBiv	-124		chr17	80560098	80560634	FOXK2	+	GB_SHO	6_EnhG	-83045											chr10	99338056	99338240	ANKRD2	GB_CGI	5_TxWk	+	-6042		chr2	241395288	241395755	GPC1	+
chr6	33358593	33358798	KIFC1	+	PP_SHO	7_Enh	515		chr5	957913	959141	LOC100506688	-	IG_CGI	12_EnhBiv	38314		chr18	13915006	13916113	MC2R	-	PP_NC	1_TssA	-407											chr10	123353298	123354194	FGFR2	PP_SHE	15_Quies	-	3778		chr3	27761408	27761677	EOMES	-
chr6	41007450	41007522	UNC5CL	-	PP_NC	7_Enh	-594		chr5	1016279	1016768	NKD2	+	GB_NC	12_EnhBiv	-7824		chr19	611107	611506	HCN2	+	GB_CGI	7_Enh	-21613											chr11	3187921	3188016	OSBPL5	PP_SHO	5_TxWk	-	-47		chr3	49459909	49460162	NICN1	-
chr6	41009313	41010316	TSPO2	+	PP_NC	5_TxWk	-23		chr5	1052828	1052919	SLC12A7	-	GB_SHO	6_EnhG	59231		chr19	1270334	1271275	CIRBP	+	PP_SHO	3_TxFlnk	-11891											chr11	44324925	44325960	ALX4	GB_CGI	13_ReprPC	-	5756		chr3	49947793	49948429	MON1A	-
chr6	47665223	47666329	GPR115	+	PP_NC	7_Enh	-12729		chr5	1552064	1553224	CR749689	-	IG_SHO	7_Enh	15460		chr19	1827719	1828388	REXO1	-	GB_CGI	3_TxFlnk	20064											chr11	44327015	44328423	ALX4	GB_CGI	12_EnhBiv	-	3293		chr3	50310766	50311213	SEMA3B	+
chr6	99290284	99290737	POU3F2	+	DS_CGI	13_ReprPC	-8157		chr5	150019603	150020338	SYNPO	+	PP_NC	7_Enh	-39696		chr19	15530606	15530737	AKAP8L	-	PP_SHO	7_Enh	-785											chr11	61522765	61523045	MYRF	PP_SHE	7_Enh	+	-2931		chr3	50312913	50313996	SEMA3B	+
chr6	106582638	106583218	PRDM1	+	IG_NC	7_Enh	-49023		chr5	169758055	169758391	LOC257358	+	PP_NC	7_Enh	44		chr19	15538910	15539194	WIZ	-	GB_CGI	6_EnhG	21568											chr11	62474725	62475078	HNRNPUL2-BSCL2	PP_SHO	7_Enh	-	19778		chr3	55517101	55518798	WNT5A	-
chr6	116381609	116382876	FRK	-	PP_NC	1_TssA	-955		chr5	171765285	171765653	SH3PXD2B	-	GB_SHO	6_EnhG	115874		chr19	17212316	17212632	MYO9B	+	GB_CGI	4_Tx	-26041											chr11	64136015	64136089	RPS6KA4	PP_CGI	4_Tx	+	-9469		chr3	65342546	65342971	MAGI1	-
chr6	128222053	128222390	THEMIS	-	PP_NC	7_Enh	17386		chr5	175955353	175955925	RNF44	-	GB_NC	6_EnhG	9101		chr19	18385672	18385930	KIAA1683	-	PP_NC	7_Enh	-611											chr11	64951798	64952034	CAPN1	GB_CGI	5_TxWk	+	-3997		chr3	138666719	138668187	AK304483	+
chr6	169567609	169568564	AF086258	-	IG_SHO	7_Enh	14271		chr5	176519331	176520024	FGFR4	+	GB_SHO	6_EnhG	-6137		chr19	18771079	18771179	KLHL26	+	GB_CGI	7_Enh	-23404											chr11	70958230	70958936	SHANK2	IG_SHE	5_TxWk	-	4687		chr3	139257713	139257907	RBP1	-
chr7	226444	226563	FAM20C	+	GB_SHO	7_Enh	-33594		chr5	176522511	176523370	FGFR4	+	GB_SHE	3_TxFlnk	-9483		chr19	41306455	41307228	EGLN2	+	GB_CGI	3_TxFlnk	-2327											chr11	83393062	83393677	DLG2	PP_NC	15_Quies	-	1945289		chr3	147077186	147077774	ZIC4	-
chr7	809048	809109	HEATR2	+	GB_SHO	7_Enh	-42771		chr5	176919234	176920259	PDLIM7	-	GB_CGI	6_EnhG	4348		chr19	49993125	49993217	RPL13A	+	PP_SHO	3_TxFlnk	-2406											chr11	116708299	116708517	APOA1	PP_SHO	5_TxWk	-	149		chr3	147114406	147115930	ZIC4	-
chr7	872053	872797	SUN1	+	PP_NC	7_Enh	-17269		chr5	177548615	177549014	AK127224	+	GB_NC	3_TxFlnk	-516		chr19	56187475	56188459	EPN1	+	PP_SHO	7_Enh	-1867											chr11	129817418	129818518	PRDM10	PP_NC	5_TxWk	-	54212		chr3	147122664	147123475	ZIC4	-
chr7	966947	967038	ADAP1	-	GB_SHO	7_Enh	28005		chr5	178741004	178741374	ADAMTS2	-	GB_NC	7_Enh	31057		chr20	11898478	11898851	BTBD3	+	PP_NC	2_TssAFlnk	-27480											chr12	3373534	3373764	TSPAN9	GB_NC	15_Quies	+	-187243		chr3	147137503	147138293	ZIC1	+
chr7	1135879	1136023	C7orf50	-	GB_CGI	7_Enh	41873		chr5	179220589	179220820	MAML1	+	PP_SHO	7_Enh	-60969		chr20	17943403	17943971	SNX5	-	PP_NC	7_Enh	5652											chr12	6483708	6483772	SCNN1A	PP_NC	7_Enh	-	3124		chr3	158390329	158390671	LXN	-
chr7	1594949	1596118	TMEM184A	-	PP_NC	7_Enh	4339		chr6	7269024	7269328	SSR1	-	IG_CGI	7_Enh	78351		chr20	30597590	30597694	CCM2L	+	PP_NC	7_Enh	551											chr12	6881595	6881629	LAG3	PP_SHO	5_TxWk	+	49		chr3	184104380	184104518	CHRD	+
chr7	2058865	2059796	MAD1L1	-	GB_SHO	7_Enh	213082		chr6	19180718	19180751	AK097585	-	IG_NC	7_Enh	-7		chr20	44574271	44575021	PCIF1	+	GB_CGI	6_EnhG	-11754											chr12	6949114	6950123	GNB3	PP_NC	5_TxWk	+	-1005		chr3	184319417	184320734	EPHB3	+
chr7	2563670	2563909	LFNG	+	GB_CGI	7_Enh	-11746		chr6	25138551	25138951	CMAHP	-	PP_SHO	1_TssA,2_TssAFlnk	27842		chr21	45560818	45561490	C21orf33	+	GB_CGI	7_Enh	-8003											chr12	53612551	53612734	RARG	GB_SHO	5_TxWk	-	14030		chr3	193587264	193587600	AK091265	-
chr7	2677986	2678263	TTYH3	+	GB_NC	7_Enh	-6678		chr6	30009745	30010005	ZNRD1-AS1	-	GB_NC	5_TxWk	19412		chr22	19928445	19928740	TXNRD2	-	PP_SHO	2_TssAFlnk	601											chr12	54689278	54690818	NFE2	PP_NC	5_TxWk	-	4087		chr4	682834	683240	MFSD7	-
chr7	2728776	2728912	AMZ1	+	GB_SHO	5_TxWk	-9756		chr6	30130449	30130819	TRIM15	+	PP_NC	14_ReprPCWk	174		chr22	22901648	22902047	LOC648691	+	PP_SHO	7_Enh	108											chr12	93130178	93130344	PLEKHG7	PP_NC	15_Quies	+	-15063		chr4	4763284	4763596	AK056081	+
chr7	2773010	2773127	GNA12	-	GB_SHO	5_TxWk	110831		chr6	30580546	30582416	PPP1R10	-	GB_SHE	3_TxFlnk	3973		chr22	36044151	36044792	APOL6	+	PP_NC	2_TssAFlnk	-350											chr12	115131223	115131846	TBX3	DP_SHO	14_ReprPCWk	-	-9877		chr4	7289507	7289858	SORCS2	+
chr7	2800436	2801248	GNA12	-	GB_SHO	7_Enh	82710		chr6	30652268	30652829	PPP1R18	-	GB_SHO	3_TxFlnk	2843		chr22	36681296	36681321	MYH9	-	GB_NC	4_Tx	102742											chr12	115134201	115134688	TBX3	IG_SHO	13_ReprPC	-	-12719		chr4	7657303	7657708	SORCS2	+
chr7	4242962	4243604	SDK1	+	GB_NC	15_Quies,7_Enh	-902524		chr6	30656024	30656094	NRM	-	PP_SHO	3_TxFlnk	3103		chr22	39709853	39710023	RPL3	-	PP_NC	6_EnhG	6371											chr12	115137528	115138766	TBX3	IG_CGI	14_ReprPCWk	-	-16797		chr4	41361623	41362115	LIMCH1	+
chr7	4723667	4723927	FOXK1	+	GB_SHO	7_Enh	-40539		chr6	30720080	30720491	IER3	-	DP_NC	7_Enh	-8160		chr22	39712633	39713086	RPL3	-	PP_SHE	3_TxFlnk	3308											chr12	117468061	117468289	AK055849	GB_NC	5_TxWk	+	-347		chr4	54457645	54457928	PDGFRA	+
chr7	4764845	4765312	FOXK1	+	GB_CGI	2_TssAFlnk	-81924		chr6	31090929	31091383	PSORS1C1	+	GB_NC	5_TxWk	-8856		chr22	39917833	39919237	DQ601415	+	GB_SHO	3_TxFlnk	294											chr12	122020166	122021013	KDM2B	DP_SHE	5_TxWk	-	-2093		chr4	77723057	77723415	SHROOM3	+
chr7	6205417	6205671	CYTH3	-	GB_CGI	7_Enh	106604		chr6	31543219	31543300	TNF	+	PP_NC	12_EnhBiv	44		chr22	41763093	41763280	TEF	+	PP_NC	7_Enh	57											chr12	123477107	123477147	PITPNM2	GB_NC	5_TxWk	-	157415		chr4	81117853	81119473	PRDM8	+
chr7	6435144	6436101	RAC1	+	GB_NC	7_Enh	-21947		chr6	32014605	32015215	TNXB	-	PP_NC	6_EnhG	67896		chr22	46448690	46449981	MIRLET7BHG	+	PP_SHO	1_TssA	-255											chr13	48876603	48876866	LINC00441	PP_SHO	5_TxWk	-	931		chr4	111560462	111560807	PITX2	-
chr7	33080496	33080615	NT5C3A	-	PP_NC	15_Quies	21794		chr6	32060681	32061084	TNXB	-	GB_SHE	6_EnhG	22027		chr22	46469091	46470191	MIRLET7BHG	+	IG_SHO	3_TxFlnk	-19365											chr13	113410966	113411561	ATP11A	GB_SHO	15_Quies	+	-66918		chr4	113432701	113432911	NEUROG2	-
chr7	45018658	45019005	MYO1G	-	PP_NC	7_Enh	-308		chr6	32078398	32078624	ATF6B	-	PP_NC	6_EnhG	17406																				chr14	37052668	37054509	NKX2-8	DP_CGI	13_ReprPC	-	-2697		chr4	124468530	124468840	TRNA_Cys	-
chr7	47611235	47611926	TNS3	-	GB_NC	7_Enh	10230		chr6	32081491	32081789	ATF6B	-	DP_NC	6_EnhG	14241																				chr14	68830704	68831098	RAD51B	GB_NC	7_Enh	+	-544602		chr4	151501623	151501739	LRBA	-
chr7	73245457	73246406	CLDN4	+	GB_CGI	1_TssA	-32534		chr6	32097420	32097481	FKBPL	-	PP_SHO	2_TssAFlnk	587																				chr14	95236879	95238988	GSC	DP_SHO	13_ReprPC	-	-2426		chr4	151503588	151504920	LRBA	-
chr7	100886961	100887364	FIS1	-	GB_SHO	2_TssAFlnk	8233		chr6	32942710	32942808	BRD2	+	GB_SHO	3_TxFlnk	-6371																				chr14	99664243	99664344	BCL11B	GB_NC	5_TxWk	-	73517		chr4	154711171	154711519	SFRP2	-
chr7	107770791	107771148	LAMB4	-	PP_NC	15_Quies	-347		chr6	33128825	33129106	COL11A2	-	DS_SHO	7_Enh	31170																				chr14	101830869	101831690	DIO3AS	IG_CGI	7_Enh	-	190323		chr4	154711597	154711906	SFRP2	-
chr7	117067804	117067978	ASZ1	-	PP_SHO	15_Quies	199		chr6	43456984	43457511	TJAP1	+	PP_NC	6_EnhG	-12250																				chr14	105944655	105945685	CRIP2	GB_CGI	13_ReprPC	+	-6386		chr4	183061830	183062004	MGC45800	-
chr7	134575145	134575524	CALD1	+	PP_NC	7_Enh	-146521		chr6	52440429	52441068	TRAM2	-	GB_SHO	2_TssAFlnk	645																				chr15	37173638	37174661	LOC145845	GB_SHO	13_ReprPC	-	4073		chr4	183795310	183795785	DCTD	-
chr7	135433540	135433736	FAM180A	-	PP_NC	15_Quies	-142		chr6	76203225	76203675	FILIP1	-	PP_NC	1_TssA	-221																				chr15	66998998	67000045	SMAD6	PP_SHE	7_Enh	+	-5479		chr4	184018031	184018637	WWC2-AS2	-
chr7	151442351	151442481	PRKAG2	-	GB_NC	7_Enh	131729		chr6	109274429	109274496	ARMC2	+	GB_NC	7_Enh	-104877																				chr15	67417607	67417697	SMAD3	PP_NC	7_Enh	+	-61596		chr4	188953092	188953527	ZFP42	+
chr7	154719693	154720452	LOC100132707	+	PP_NC	1_TssA,2_TssAFlnk	-225		chr6	110736865	110737053	DDO	-	PP_NC	14_ReprPCWk	-288																				chr15	67458370	67458522	SMAD3	PP_NC	4_Tx	+	-102421		chr5	1100209	1100544	SLC12A7	-
chr7	158818053	158818164	LINC00689	+	GB_SHO	7_Enh	-18951		chr6	149805995	149806339	ZC3H12D	-	PP_NC	7_Enh	-142																				chr15	74466794	74466933	ISLR	PP_SHO	15_Quies	+	-921		chr5	1885174	1885778	IRX4	-
chr8	514736	514821	TDRP	-	IG_NC	7_Enh	-19040		chr6	152125965	152126441	ESR1	+	PP_SHE	13_ReprPC	-148615																				chr15	76005861	76006143	CSPG4	PP_NC	5_TxWk	-	-954		chr5	14487268	14488003	TRIO	+
chr8	1810297	1810526	ARHGEF10	+	GB_NC	5_TxWk	-38384		chr6	158438202	158439869	SYNJ2	+	GB_NC	7_Enh	-36981																				chr15	96896680	96897190	NR2F2	IG_CGI	7_Enh	+	-28023		chr5	16737972	16738125	MYO10	-
chr8	2146870	2147652	AX747124	+	IG_NC	15_Quies	353		chr6	161860203	161860359	PARK2	-	GB_NC	7_Enh	1288444																				chr15	96904723	96905729	NR2F2	IG_CGI	13_ReprPC 14_ReprPCWk	+	-36562		chr5	32445429	32445523	ZFR	-
chr8	17206671	17206819	MTMR7	-	GB_NC	7_Enh	64218		chr6	163768213	163768551	DKFZp451B082	-	PP_NC	7_Enh	-148																				chr15	101728611	101728653	CHSY1	GB_NC	5_TxWk	-	63484		chr5	37833969	37834171	GDNF	-
chr8	37595307	37595363	ERLIN2	+	GB_SHO	7_Enh	-1246		chr6	164506581	164506861	AK093114	+	IG_NC	7_Enh	-413945																				chr15	101991512	101991886	PCSK6	GB_NC	15_Quies	-	73519		chr5	37835506	37836119	GDNF	-
chr8	49835988	49836230	SNAI2	-	DP_CGI	7_Enh	-1931		chr6	166100251	166100316	PDE10A	-	IG_NC	14_ReprPCWk	299775																				chr16	49732224	49732623	ZNF423	GB_CGI	5_TxWk	-	159207		chr5	74162809	74162924	FAM169A	-
chr8	120218354	120220073	MAL2	+	PP_SHO	2_TssAFlnk	-42800		chr6	168479787	168480013	FRMD1	-	PP_SHO	7_Enh	2224																				chr16	55542668	55542751	LPCAT2	PP_SHO	15_Quies	+	159		chr5	83016717	83017184	HAPLN1	-
chr8	124194935	124195192	FAM83A	+	PP_NC	7_Enh	-3992		chr6	170364824	170365525	LINC00574	+	IG_NC	7_Enh	-175108																				chr16	86120849	86121312	IRF8	IG_NC	14_ReprPCWk	+	-188903		chr5	92914202	92914828	NR2F1-AS1	-
chr8	130799007	130799851	GSDMC	-	PP_NC	15_Quies	-717		chr6	170494301	170494475	LOC154449	-	IG_SHO	7_Enh	77182																				chr16	88564112	88565080	ZFPM1	GB_CGI	5_TxWk	+	-45355		chr5	134362967	134363823	PITX1	-
chr8	131368433	131369596	ASAP1	-	GB_SHO	7_Enh	86310		chr6	170535724	170536124	LOC154449	-	IG_NC	7_Enh	35533																				chr16	89070185	89070757	CBFA2T3	IG_CGI	15_Quies	-	-27145		chr5	134376442	134377058	LOC100996485	+
chr8	135726091	135726595	ZFAT	-	PP_SHO	15_Quies	-1303		chr7	608384	610887	PRKAR1B	-	GB_SHO	7_Enh	156400																				chr17	4510572	4511132	SMTNL2	GB_CGI	4_Tx	+	-23838		chr5	134526124	134526269	LOC100996485	+
chr8	141599141	141599356	AGO2	-	GB_NC	7_Enh	46362		chr7	788797	788989	HEATR2	+	GB_SHE	7_Enh	-22651																				chr17	6658198	6658898	XAF1	PP_NC	15_Quies	+	-132		chr5	134735675	134736598	H2AFY	-
chr8	143761585	143761811	AX747544	-	PP_NC	7_Enh	1573		chr7	808592	808834	HEATR2	+	GB_CGI	7_Enh	-42496																				chr17	8958019	8958090	NTN1	GB_NC	15_Quies	+	-33231		chr5	138713897	138714322	SLC23A1	-
chr8	143763326	143763565	PSCA	+	GB_NC	7_Enh	-11839		chr7	816960	818362	HEATR2	+	GB_SHE	6_EnhG	-52024																				chr17	35241844	35242990	BC084573	IG_NC	14_ReprPCWk	-	50931		chr5	139490895	139492230	PURA	+
chr8	144069697	144070780	LOC100133669	-	GB_NC	7_Enh	29027		chr7	819621	821314	HEATR2	+	GB_SHO	6_EnhG	-54976																				chr17	37784694	37784895	PPP1R1B	PP_SHO	14_ReprPCWk	+	-1902		chr5	140871156	140871590	PCDHGC5	+
chr8	144654887	144656997	NAPRT1	-	PP_SHO	7_Enh	3822		chr7	1026168	1026363	CYP2W1	+	GB_CGI	12_EnhBiv	-3528																				chr17	40822424	40823572	PLEKHH3	GB_CGI	4_Tx 5_TxWk	-	5476		chr5	149545907	149547566	CDX1	+
chr8	144800997	144801223	MAPK15	+	GB_CGI	5_TxWk	-2794		chr7	1030197	1031548	CYP2W1	+	DS_SHO	7_Enh	-8713																				chr17	42254336	42254645	C17orf65	GB_CGI	5_TxWk	-	359		chr5	154092109	154092360	LARP1	+
chr8	144820683	144821641	LOC100128338	+	GB_CGI	7_Enh	-4373		chr7	1059627	1059784	C7orf50	-	GB_CGI	6_EnhG	118112																				chr17	46606190	46608559	HOXB1	PP_CGI	14_ReprPCWk	-	-200		chr5	172096764	172097289	NEURL1B	+
chr8	144895082	144895243	MIR937	-	PP_CGI	7_Enh	-31		chr7	1097123	1097457	GPR146	+	PP_SHO	7_Enh	-13245																				chr17	46622899	46624268	HOXB-AS1	PP_SHE	7_Enh	+	-3355		chr5	172110211	172110579	NEURL1B	+
chr8	145012644	145013478	PLEC	-	GB_SHE	1_TssA	37424		chr7	1140782	1141341	C7orf50	-	GB_CGI	7_Enh	36555																				chr17	46628717	46630630	HOXB3	GB_SHO	5_TxWk	-	51644		chr5	172673098	172673349	NKX2-5	-
chr8	145014989	145015964	PLEC	-	PP_SHO	2_TssAFlnk	34938		chr7	1145775	1145852	C7orf50	-	GB_SHE	7_Enh	32044																				chr17	46666926	46669489	HOXB5	PP_SHO	13_ReprPC	-	1834		chr5	176557982	176558909	NSD1	+
chr8	145019475	145019639	PLEC	-	PP_SHO	3_TxFlnk	31263		chr7	1153106	1153507	C7orf50	-	GB_SHE	7_Enh	24389																				chr17	46671861	46672924	HOXB-AS3	PP_SHO	13_ReprPC	+	-45932		chr5	179228489	179229353	MGAT4B	-
chr8	145025059	145025128	PLEC	-	PP_CGI	1_TssA	25774		chr7	1365745	1365868	UNCX	+	IG_SHE	12_EnhBiv	-93325																				chr17	46676375	46677960	HOXB-AS3	GB_SHO	13_ReprPC	+	-50968		chr5	180646608	180646880	TRNA_Val	+
chr8	145649036	145649678	VPS28	-	GB_CGI	6_EnhG	4253		chr7	1606859	1607868	PSMG3	-	GB_SHO	6_EnhG	2773																				chr17	54893150	54893277	C17orf67	GB_NC	15_Quies	-	22857		chr6	1601369	1602137	FOXC1	+
chr8	145728138	145728209	PPP1R16A	+	PP_SHO	7_Enh	-24857		chr7	1748324	1748766	ELFN1	+	PP_NC	6_EnhG	-21011																				chr17	55962703	55963102	CUEDC1	GB_CGI	5_TxWk	-	69582		chr6	1604134	1604212	FOXC1	+
chr9	139890188	139891058	CLIC3	-	PP_SHO	1_TssA	197		chr7	2328746	2329077	SNX8	-	GB_NC	7_Enh	64876																				chr17	58499679	58499911	C17orf64	PP_SHO	15_Quies	+	-30121		chr6	1615236	1617619	FOXC1	+
chr10	415359	416315	DIP2C	-	GB_SHO	7_Enh	319368		chr7	2499915	2500200	BC034268	+	IG_CGI	7_Enh	-22517																				chr17	62084322	62084359	ICAM2	PP_NC	15_Quies	-	13635		chr6	1619094	1619445	GMDS	-
chr10	521758	521830	DIP2C	-	GB_SHE	5_TxWk	213853		chr7	2563611	2563909	LFNG	+	GB_CGI	11_BivFlnk,12_EnhBiv	-11746																				chr17	79374691	79375254	BAHCC1	PP_CGI	2_TssAFlnk	+	-1151		chr6	1621093	1621930	GMDS	-
chr10	536227	537178	DIP2C	-	GB_NC	7_Enh	198505		chr7	2646478	2647039	IQCE	+	GB_SHO	7_Enh	-48407																				chr17	79921715	79921870	NOTUM	DP_SHO	14_ReprPCWk	-	-2154		chr6	4774309	4775222	CDYL	+
chr10	557562	557936	DIP2C	-	GB_NC	7_Enh	177747		chr7	2653651	2654053	IQCE	+	GB_NC	7_Enh	-55421																				chr18	19752362	19753208	GATA6	GB_SHO	10_TssBiv	+	-3804		chr6	5087031	5087749	PPP1R3G	+
chr10	661159	661730	DIP2C	-	GB_NC	7_Enh	73953		chr7	5534721	5535748	MIR589	-	PP_SHO	6_EnhG	-200																				chr19	44005808	44005906	PHLDB3	GB_CGI	6_EnhG	-	3181		chr6	13428522	13428657	GFOD1	-
chr10	664762	665102	DIP2C	-	GB_NC	7_Enh	70581		chr7	6208128	6208238	CYTH3	-	GB_SHO	6_EnhG	104037																				chr19	45898849	45900241	PPP1R13L	GB_CGI	4_Tx	-	9366		chr6	14282477	14283006	CD83	+
chr10	670815	671497	DIP2C	-	GB_SHE	2_TssAFlnk,7_Enh	64186		chr7	30791030	30792301	INMT-FAM188B	+	PP_NC	2_TssAFlnk	-548																				chr19	47258676	47260556	FKRP	GB_CGI	4_Tx 5_TxWk	+	-11253		chr6	15244618	15244745	JARID2	+
chr10	2699291	2699357	LINC00701	-	IG_NC	15_Quies	-342088		chr7	30951425	30951801	AQP1	+	PP_NC	2_TssAFlnk	-58791																				chr19	49077983	49078119	SULT2B1	PP_NC	5_TxWk	+	-22787		chr6	21667333	21667815	LINC00340	+
chr10	3678924	3679085	BC037918	+	IG_NC	7_Enh	-318037		chr7	44183410	44183642	GCK	-	DP_SHO	7_Enh	54127																				chr20	31352228	31352874	DNMT3B	GB_SHO	15_Quies	+	-2683		chr6	29599160	29599331	GABBR1	-
chr10	3823758	3823907	KLF6	-	GB_CGI	3_TxFlnk	3566		chr7	44795713	44795780	ZMIZ2	+	PP_NC	6_EnhG	-7600																				chr20	55199914	55200973	TFAP2C	DP_CGI	7_Enh	+	3385		chr6	31651070	31651362	LY6G5C	-
chr10	8101307	8101566	GATA3	+	GB_SHO	3_TxFlnk	-5999		chr7	56160409	56161020	PHKG1	-	PP_NC	2_TssAFlnk	-331																				chr22	17956453	17956560	CECR2	PP_NC	15_Quies	+	-115723		chr6	31705273	31706222	CLIC1	-
chr10	11825471	11825795	ECHDC3	+	IG_NC	15_Quies,7_Enh	-41430		chr7	73720808	73721031	CLIP2	+	GB_CGI	7_Enh	-17226																				chr22	28191222	28192794	MN1	GB_SHO	5_TxWk	-	4692		chr6	32026147	32026302	TNXB	-
chr10	13424911	13425688	SEPHS1	-	IG_NC	7_Enh	-35391		chr7	98424185	98424445	TMEM130	-	IG_NC	7_Enh	43949																													chr6	32054845	32055068	TNXB	-
chr10	70847350	70847794	SRGN	+	PP_NC	15_Quies	68		chr7	99690806	99691447	DD413568	+	PP_NC	6_EnhG	-9																													chr6	32064764	32064842	TNXB	-
chr10	75631588	75632066	CAMK2G	-	GB_SHO	5_TxWk	2277		chr7	100463508	100463985	SLC12A9	+	PP_CGI	2_TssAFlnk,7_Enh	-39543																													chr6	32117377	32117725	PRRT1	-
chr10	96443165	96443383	CYP2C18	+	PP_NC	15_Quies	-132		chr7	101558400	101558698	CUX1	+	GB_SHO	7_Enh	-99739																													chr6	32118811	32119874	PRRT1	-
chr10	98031201	98031964	BLNK	-	PP_NC	5_TxWk,7_Enh	-620		chr7	112120734	112122217	LSMEM1	+	PP_NC	1_TssA	-1309																													chr6	32119939	32120783	LOC100507547	-
chr10	99331332	99332592	ANKRD2	+	PP_SHO	7_Enh	-394		chr7	148497907	148497970	CUL1	+	GB_NC	6_EnhG	-102964																													chr6	32120895	32120955	LOC100507547	-
chr10	104211319	104211424	LOC100505761	+	PP_SHO	7_Enh	-1745		chr7	150744274	150745278	ABCB8	+	PP_SHO	7_Enh	-19768																													chr6	32134622	32134748	EGFL8	+
chr10	105238873	105239205	CALHM3	-	PP_NC	7_Enh	-208		chr7	150878243	150878399	ASB10	-	GB_NC	7_Enh	6520																													chr6	33179659	33179772	RING1	+
chr10	105845238	105846129	COL17A1	-	PP_NC	7_Enh	-369		chr7	158799715	158800547	LINC00689	+	PP_SHO	7_Enh	-1334																													chr6	33245467	33245516	B3GALT4	+
chr10	121271663	121271840	RGS10	-	GB_NC	7_Enh	30380		chr8	1811760	1812138	ARHGEF10	+	GB_NC	6_EnhG	-39996																													chr6	33265016	33265393	RGL2	-
chr10	132632119	132632650	MIR378C	-	IG_NC	15_Quies	128281		chr8	6630612	6630930	AGPAT5	+	IG_NC	2_TssAFlnk	-65052																													chr6	33386967	33387003	SYNGAP1	+
chr10	134222218	134222507	PWWP2B	+	GB_SHE	7_Enh	-11835		chr8	37702396	37702581	BRF2	-	GB_SHE	6_EnhG	4841																													chr6	33400021	33400528	SYNGAP1	+
chr11	393570	394545	PKP3	+	PP_SHO	1_TssA	-1931		chr8	49835988	49836160	SNAI2	-	DP_CGI	7_Enh	-1861																													chr6	33943662	33943929	MIR1275	-
chr11	460469	460633	PTDSS2	+	GB_CGI	7_Enh	-12365		chr8	61777711	61779045	CHD7	+	GB_NC	6_EnhG	-187708																													chr6	34206152	34206683	HMGA1	+
chr11	796069	796607	SLC25A22	-	PP_SHO	7_Enh	1709		chr8	110693195	110693289	SYBU	-	PP_NC	15_Quies	10731																													chr6	37461253	37461350	CCDC167	-
chr11	818834	818903	PNPLA2	+	PP_SHO	2_TssAFlnk	-1		chr8	124214953	124215129	FAM83A-AS1	-	PP_NC	14_ReprPCWk	-146																													chr6	37617864	37618123	MDGA1	-
chr11	985589	986709	AP2A2	+	GB_NC	4_Tx	-61815		chr8	141599356	141600099	AGO2	-	GB_NC	7_Enh	45619																													chr6	41068553	41068752	NFYA	+
chr11	1854368	1855389	SYT8	+	PP_NC	7_Enh	-6680		chr8	142179603	142179697	DENND3	+	GB_SHE	7_Enh	-52320																													chr6	41376604	41377288	NCR2	+
chr11	1855851	1856307	SYT8	+	GB_NC	7_Enh	-7598		chr8	142200912	142201025	DENND3	+	GB_NC	6_EnhG	-73648																													chr6	41516085	41517062	FOXP4	+
chr11	1945564	1945918	TNNT3	+	GB_SHO	7_Enh	-5126		chr8	143868049	143868110	LY6D	-	PP_NC	14_ReprPCWk	-102																													chr6	41528502	41529888	FOXP4	+
chr11	1947743	1949113	TNNT3	+	GB_CGI	7_Enh	-8321		chr8	145024637	145025128	PLEC	-	PP_CGI	2_TssAFlnk	25774																													chr6	45609407	45609895	RUNX2	+
chr11	1974132	1975304	MRPL23	+	GB_CGI	7_Enh	-6796		chr8	145728138	145728490	PPP1R16A	+	PP_SHO	2_TssAFlnk	-25138																													chr6	75911956	75912633	COL12A1	-
chr11	1977669	1978861	MRPL23	+	DS_CGI	7_Enh	-10353		chr10	743286	743478	DIP2C	-	DP_CGI	12_EnhBiv	-7795																													chr6	75916963	75918165	COL12A1	-
chr11	1980392	1981302	MRPL23	+	DS_SHO	7_Enh	-12794		chr10	1509675	1509859	ADARB2	-	GB_SHE	12_EnhBiv	269811																													chr6	100893665	100895211	SIM1	-
chr11	1983125	1983308	MRPL23	+	IG_CGI	7_Enh	-14800		chr10	1595633	1595940	ADARB2-AS1	+	GB_CGI	12_EnhBiv	-27108																													chr6	107809317	107809541	SOBP	+
chr11	2011216	2012071	MRPL23-AS1	-	PP_SHE	7_Enh	-921		chr10	3149760	3149852	PFKP	+	GB_SHO	6_EnhG	-41327																													chr6	134210138	134210812	TCF21	+
chr11	2150687	2152428	INS-IGF2	-	GB_SHE	5_TxWk	30011		chr10	3824516	3824687	KLF6	-	GB_SHO	3_TxFlnk	2786																													chr6	134214134	134214995	TCF21	+
chr11	2154113	2155521	INS-IGF2	-	GB_CGI	13_ReprPC	26918		chr10	28233109	28233188	ARMC4	-	GB_NC	15_Quies	54789																													chr6	169026352	169027218	SMOC2	+
chr11	2293117	2293201	ASCL2	-	PP_SHO	12_EnhBiv	-1019		chr10	50339928	50340173	FAM170B	-	GB_CGI	7_Enh	1880																													chr6	169273007	169273530	SMOC2	+
chr11	2722539	2722713	KCNQ1	+	PP_SHO	7_Enh	-256799		chr10	50341989	50342145	FAM170B	-	PP_SHO	7_Enh	-92																													chr6	169285957	169286588	SMOC2	+
chr11	2920052	2920209	SLC22A18AS	-	PP_SHE	7_Enh	4761		chr10	50530719	50530868	C10orf71	+	GB_SHE	6_EnhG	-23681																													chr6	170411557	170411909	LOC154449	-
chr11	8832817	8833095	ST5	-	PP_NC	7_Enh	99403		chr10	70979777	70979827	HKDC1	+	PP_NC	14_ReprPCWk	232																													chr7	752624	752743	PRKAR1B	-
chr11	12306515	12307496	MICALCL	+	PP_NC	7_Enh	-9869		chr10	75401236	75402204	MYOZ1	-	PP_NC	2_TssAFlnk	-689																													chr7	907797	908060	SUN1	+
chr11	33744043	33744977	CD59	-	PP_NC	7_Enh	13014		chr10	75410777	75411501	SYNPO2L	-	PP_SHE	6_EnhG	12060																													chr7	1265851	1268188	UNCX	+
chr11	33758505	33759043	CD59	-	PP_SHO	5_TxWk	-1052		chr10	82299606	82300588	SH2D4B	+	PP_SHE	7_Enh	-2930																													chr7	1329387	1329462	UNCX	+
chr11	34535140	34535481	ELF5	-	PP_NC	7_Enh	-129		chr10	86001246	86001560	LRRC21	-	PP_SHE	7_Enh	92																													chr7	1889727	1889793	MAD1L1	-
chr11	45928841	45928988	C11orf94	-	PP_NC	5_TxWk	-155		chr10	86004424	86005121	RGR	+	PP_NC	7_Enh	-312																													chr7	1895903	1896220	MAD1L1	-
chr11	62308513	62309707	AHNAK	-	GB_NC	7_Enh	14000		chr10	97175272	97175479	SORBS1	-	GB_NC	6_EnhG	145692																													chr7	2105368	2105443	MAD1L1	-
chr11	65190999	65193528	NEAT1	+	GB_SHO	1_TssA	-3283		chr10	99330056	99330447	UBTD1	+	GB_CGI	6_EnhG	-71822																													chr7	2119076	2119499	MAD1L1	-
chr11	66822853	66823684	RHOD	+	PP_SHO	2_TssAFlnk	605		chr10	102766458	102767507	PDZD7	-	GB_CGI	6_EnhG	23383																													chr7	2140143	2140321	MAD1L1	-
chr11	67418113	67418148	ACY3	-	PP_NC	15_Quies	-18		chr10	116444240	116444414	ABLIM1	-	PP_NC	2_TssAFlnk	348																													chr7	3920297	3920534	SDK1	+
chr11	67442067	67442408	ALDH3B2	-	PP_NC	7_Enh	6263		chr10	125803767	125804060	CHST15	-	GB_SHO	7_Enh	49146																													chr7	4304846	4305061	SDK1	+
chr11	67810742	67811265	TCIRG1	+	GB_NC	7_Enh	-4782		chr10	130185305	130185387	AK124226	+	IG_NC	14_ReprPCWk	-205905																													chr7	4746131	4746837	FOXK1	+
chr11	68138269	68139725	LRP5	+	GB_NC	7_Enh	-59648		chr10	131005696	131005778	MGMT	+	IG_NC	7_Enh	259670																													chr7	6693030	6693838	DQ594582	+
chr11	69064741	69065869	MYEOV	+	DS_NC	7_Enh	-4264		chr10	131694575	131694856	EBF3	-	GB_CGI	6_EnhG	67249																													chr7	23245557	23246105	AK057873	+
chr11	117947611	117947997	TMPRSS4	+	PP_NC	14_ReprPCWk	-244		chr10	133775416	133775551	PPP2R2D	+	IG_NC	6_EnhG	-27596																													chr7	25893749	25894005	RNU6-16P	-
chr11	119993934	119995754	TRIM29	-	GB_NC	7_Enh	60483		chr10	133872262	133872532	JAKMIP3	+	IG_NC	13_ReprPC	45643																													chr7	25991722	25992424	MIR148A	-
chr12	6648770	6649349	IFFO1	-	GB_SHO	7_Enh	15890		chr10	133929429	133929519	JAKMIP3	+	GB_SHO	7_Enh	-11344																													chr7	27134109	27135214	HOXA1	-
chr12	6657818	6658945	IFFO1	-	GB_SHO	7_Enh	6294		chr10	133945918	133946881	JAKMIP3	+	GB_SHO	12_EnhBiv	-28706																													chr7	29518387	29519656	CHN2	+
chr12	6745057	6745568	LPAR5	-	PP_NC	7_Enh	45		chr10	133949683	133950036	JAKMIP3	+	GB_SHO	7_Enh	-31861																													chr7	29923538	29924746	WIPF3	+
chr12	7073179	7073264	MIR141	+	PP_NC	1_TssA	-4		chr10	134054469	134055144	STK32C	-	GB_NC	7_Enh	90207																													chr7	42267269	42267430	GLI3	-
chr12	8974844	8975309	A2ML1	+	PP_NC	7_Enh	-241		chr10	134230646	134231549	PWWP2B	+	DS_NC	7_Enh	-20877																													chr7	44152996	44153333	AEBP1	+
chr12	13348386	13349724	EMP1	+	PP_NC	7_Enh	-74		chr10	134420036	134420623	INPP5A	+	GB_NC	7_Enh	-69299																													chr7	47578960	47579243	TNS3	-
chr12	25801455	25801621	IFLTD1	-	PP_NC	7_Enh	-108		chr10	134801360	134801775	LOC399829	+	IG_SHE	12_EnhBiv	-22322																													chr7	90895894	90896701	FZD1	+
chr12	52585786	52585892	KRT80	-	PP_NC	7_Enh	-108		chr10	134893401	134893591	GPR123	+	DP_SHO	13_ReprPC	-9158																													chr7	92238086	92238207	CDK6	-
chr12	52914047	52915036	KRT5	-	PP_NC	7_Enh	-565		chr10	134980513	134980924	KNDC1	+	GB_CGI	7_Enh	-6973																													chr7	94953653	94954202	PON1	-
chr12	53208293	53208709	KRT4	-	PP_NC	7_Enh	-374		chr11	192096	192996	SCGB1C1	+	PP_NC	7_Enh	84																													chr7	95025736	95026066	PON1	-
chr12	53242896	53243058	KRT78	-	PP_NC	7_Enh	-182		chr11	299503	300490	IFITM5	-	PP_CGI	14_ReprPCWk	-964																													chr7	105279391	105279882	ATXN7L1	-
chr12	58209787	58210661	AVIL	-	PP_NC	5_TxWk	1826		chr11	611791	612837	IRF7	-	GB_SHO	6_EnhG	3162																													chr7	113722758	113723569	FOXP2	+
chr12	111358297	111358616	MYL2	-	PP_NC	14_ReprPCWk	-90		chr11	796421	796607	SLC25A22	-	PP_SHO	2_TssAFlnk	1709																													chr7	130125836	130126368	MEST	+
chr12	116997022	116997535	MAP1LC3B2	+	PP_NC	7_Enh	-349		chr11	859670	860134	TSPAN4	+	GB_SHO	7_Enh	-17326																													chr7	139763574	139763773	PARP12	-
chr12	120700361	120701165	PXN	-	GB_SHE	2_TssAFlnk	2409		chr11	1011049	1011315	AP2A2	+	GB_SHO	6_EnhG	-86421																													chr7	150644554	150645092	KCNH2	-
chr12	121890163	121890503	KDM2B	-	GB_CGI	7_Enh	128417		chr11	1542313	1542394	MOB2	-	GB_NC	7_Enh	-19917																													chr7	150655109	150655387	KCNH2	-
chr12	124864528	124865130	NCOR2	-	GB_NC	6_EnhG	187005		chr11	1859381	1860078	TNNI2	+	PP_NC	7_Enh	141																													chr7	150758892	150759616	SLC4A2	+
chr12	124870274	124870394	NCOR2	-	GB_SHO	6_EnhG	181741		chr11	1973545	1974332	MRPL23	+	GB_CGI	6_EnhG	-5824																													chr8	1650035	1650309	DLGAP2	+
chr12	124907105	124907367	NCOR2	-	GB_NC	2_TssAFlnk	144768		chr11	1977951	1978861	MRPL23	+	DS_CGI	3_TxFlnk	-10353																													chr8	10586678	10587055	BC043573	+
chr12	132529397	132529502	EP400	+	GB_NC	7_Enh	-94994		chr11	2170412	2170880	INS-IGF2	-	PP_NC	12_EnhBiv	11559																													chr8	21914287	21914593	DMTN	+
chr12	133100714	133101224	FBRSL1	+	GB_SHO	7_Enh	-35087		chr11	2846681	2846932	KCNQ1	+	GB_NC	7_Enh	-381018																													chr8	22223852	22223985	SLC39A14	+
chr13	24844846	24844938	SPATA13	+	GB_NC	15_Quies	-290994		chr11	2925439	2925623	SLC22A18	+	PP_SHO	13_ReprPC	-4672																													chr8	22461396	22461575	C8orf58	+
chr13	41593385	41593582	ELF1	-	PP_NC	5_TxWk	41994		chr11	47470887	47471400	RAPSN	-	PP_NC	2_TssAFlnk,7_Enh	-670																													chr8	25907314	25908503	PPP2R2A	+
chr13	47126023	47126551	LRCH1	+	PP_SHO	7_Enh	752		chr11	47607760	47609357	FAM180B	+	PP_SHE	2_TssAFlnk	-1159																													chr8	26047780	26048281	PPP2R2A	+
chr13	100085073	100085455	MIR548AN	-	IG_NC	7_Enh	-26519		chr11	57195025	57195350	SLC43A3	-	PP_SHO	7_Enh	-297																													chr8	26305569	26305656	BNIP3L	+
chr13	110431612	110432935	IRS2	-	GB_SHE	7_Enh	5980		chr11	62308492	62309364	AHNAK	-	GB_NC	6_EnhG	14343																													chr8	29732519	29732579	LOC286135	+
chr13	111522314	111522985	LINC00346	-	PP_NC	7_Enh	-823		chr11	63974772	63975026	FERMT3	+	GB_CGI	3_TxFlnk	-876																													chr8	37699360	37699923	GPR124	+
chr13	113274482	113274535	C13orf35	+	IG_NC	14_ReprPCWk	26823		chr11	63990575	63991130	FERMT3	+	GB_SHE	6_EnhG	-16980																													chr8	38757532	38757859	PLEKHA2	+
chr13	113752435	113752657	MCF2L	+	GB_SHO	15_Quies	-203965		chr11	64081545	64081631	ESRRA	+	GB_SHE	6_EnhG	-8587																													chr8	41654455	41655154	ANK1	-
chr13	114103628	114103796	ADPRHL1	-	PP_NC	7_Enh	4043		chr11	65153757	65153860	FRMD8	+	PP_CGI	2_TssAFlnk	210																													chr8	61834373	61836533	LOC100130298	-
chr13	114201583	114202067	TMCO3	+	GB_SHO	7_Enh	-56757		chr11	66104481	66105148	BRMS1	-	PP_SHE	6_EnhG	7448																													chr8	72469553	72470832	BC048982	-
chr13	114800796	114801307	RASA3	-	GB_SHE	7_Enh	96779		chr11	67219498	67220043	CABP4	+	GB_NC	7_Enh	-166																													chr8	80803207	80804323	AK055332	-
chr14	35871715	35872393	NFKBIA	-	GB_SHO	3_TxFlnk	1562		chr11	67290853	67291387	CABP2	-	PP_SHE	7_Enh	-488																													chr8	94508150	94508434	LINC00535	-
chr14	65005951	65006204	HSPA2	+	PP_SHO	1_TssA	-3581		chr11	67325980	67326225	GSTP1	+	IG_NC	2_TssAFlnk	24841																													chr8	99958470	99960148	OSR2	+
chr14	69256677	69256888	ZFP36L1	-	GB_CGI	3_TxFlnk	6302		chr11	67775972	67776576	ALDH3B1	+	PP_NC	7_Enh	-528																													chr8	102504859	102505513	GRHL2	+
chr14	75747332	75748252	FOS	+	GB_SHO	3_TxFlnk	-2775		chr11	67810742	67811641	TCIRG1	+	GB_NC	3_TxFlnk	-5158																													chr8	102506551	102507382	GRHL2	+
chr14	75988735	75989203	BATF	+	PP_NC	7_Enh	-435		chr11	68204486	68205335	LRP5	+	GB_SHO	6_EnhG	-125258																													chr8	134202337	134202370	WISP1	+
chr14	104171259	104172224	XRCC3	-	GB_NC	7_Enh	9617		chr11	71724287	71725340	NUMA1	-	GB_NC	6_EnhG	66399																													chr8	144503255	144503586	MAFA	-
chr14	105436973	105437141	AHNAK2	-	GB_NC	7_Enh	7553		chr11	75898132	75898203	WNT11	-	GB_NC	7_Enh	23577																													chr8	145701192	145702343	FOXH1	-
chr15	39874776	39875777	THBS1	+	GB_SHE	3_TxFlnk	-2497		chr11	85397109	85397684	CCDC89	-	PP_NC	2_TssAFlnk	-364																													chr8	145755756	145755974	ARHGAP39	-
chr15	41061384	41062273	C15orf62	+	PP_NC	7_Enh	-114		chr11	107582734	107582876	SLN	-	PP_NC	1_TssA	7543																													chr9	972622	973198	DMRT1	+
chr15	42186124	42187036	SPTBN5	-	PP_NC	7_Enh	-761		chr11	124768554	124768950	ROBO4	-	PP_NC	7_Enh	-554																													chr9	974533	975997	DMRT3	+
chr15	99975010	99975470	LRRC28	+	IG_NC	7_Enh	-183903		chr12	1609369	1609549	LINC00942	-	PP_NC	7_Enh	6935																													chr9	977770	978258	DMRT3	+
chr16	685580	685785	C16orf13	-	GB_CGI	1_TssA	573		chr12	6661122	6663049	IFFO1	-	GB_SHE	2_TssAFlnk	2190																													chr9	1045050	1046103	DMRT2	+
chr16	810891	811744	MSLN	+	PP_NC	7_Enh	-982		chr12	15038788	15039432	MGP	-	PP_NC	7_Enh	-572																													chr9	2047160	2047595	SMARCA2	+
chr16	1795240	1796333	MAPK8IP3	+	GB_SHO	7_Enh	-40149		chr12	49180849	49181554	ADCY6	-	GB_SHO	2_TssAFlnk	1266																													chr9	14349308	14350039	NFIB	-
chr16	2082689	2084192	TCRBV20S1	-	PP_SHE	7_Enh	88901		chr12	52437299	52437571	NR4A1	+	GB_NC	7_Enh	-20955																													chr9	131154899	131156923	MIR2964A	+
chr16	3559551	3559687	CLUAP1	+	PP_NC	7_Enh	-8763		chr12	56105981	56106698	ITGA7	-	PP_SHE	2_TssAFlnk,7_Enh	3129																													chr9	137392877	137393288	RXRA	+
chr16	8985593	8986308	USP7	-	DS_NC	4_Tx	72063		chr12	56114155	56115029	RDH5	+	PP_SHE	3_TxFlnk	-878																													chr9	139715701	139716215	RABL6	+
chr16	15596053	15596423	C16orf45	+	PP_NC	15_Quies	-68271		chr12	57595353	57595392	LRP1	+	GB_SHO	4_Tx	-73116																													chr10	575954	576100	DIP2C	-
chr16	19124925	19124984	ITPRIPL2	+	PP_SHO	1_TssA	270		chr12	58209913	58210716	AVIL	-	PP_NC	7_Enh	1771																													chr10	5734985	5735349	C10orf18	+
chr16	30106682	30106897	BOLA2	-	GB_SHO	2_TssAFlnk	-640612		chr12	116997069	116997185	MAP1LC3B2	+	PP_NC	7_Enh	1																													chr10	11207527	11208339	CELF2	+
chr16	30124803	30125232	BOLA2	-	PP_NC	6_EnhG	-658947		chr12	117407879	117408186	FBXW8	+	GB_NC	7_Enh	-59425																													chr10	14372431	14372910	FRMD4A	-
chr16	30671644	30672051	FBRS	+	DP_SHO	2_TssAFlnk	-2299		chr12	120538681	120539137	RAB35	-	GB_SHO	6_EnhG	16169																													chr10	21796388	21799047	SKIDA1	-
chr16	50730737	50730881	NOD2	+	PP_NC	7_Enh	-3367		chr12	121476720	121477854	OASL	-	PP_NC	11_BivFlnk,2_TssAFlnk	-809																													chr10	22542145	22542726	LOC100130992	+
chr16	56554249	56554313	BBS2	-	PP_SHO	2_TssAFlnk	-118		chr12	123352600	123352774	VPS37B	-	GB_SHO	6_EnhG	28217																													chr10	22622123	22623213	COMMD3-BMI1	+
chr16	57846754	57847530	KIFC3	-	IG_NC	7_Enh	49427		chr12	124907105	124908877	NCOR2	-	GB_SHE	6_EnhG	143258																													chr10	22765645	22767076	LOC100499489	-
chr16	75150456	75150819	LDHD	-	PP_SHO	5_TxWk	-150		chr12	124922600	124922727	NCOR2	-	GB_NC	6_EnhG	129408																													chr10	44788044	44788812	LOC100130539	+
chr16	75282051	75283648	BCAR1	-	PP_SHE	7_Enh	18303		chr12	124938116	124938573	NCOR2	-	GB_SHE	6_EnhG	113562																													chr10	44881551	44881934	CXCL12	-
chr16	81527360	81527504	CMIP	+	GB_NC	7_Enh	-48729		chr12	124941781	124942248	NCOR2	-	GB_SHO	3_TxFlnk	109887																													chr10	72199918	72200922	NODAL	-
chr16	85157762	85157906	FAM92B	-	IG_CGI	15_Quies	-11792		chr12	124950669	124950990	NCOR2	-	GB_CGI	3_TxFlnk	101145																													chr10	72201417	72202215	NODAL	-
chr16	85180917	85181279	LOC400548	+	GB_NC	7_Enh	-10161		chr12	125002007	125002474	NCOR2	-	GB_CGI	2_TssAFlnk	49661																													chr10	72219713	72219819	NODAL	-
chr16	86337662	86337823	LOC146513	+	IG_CGI	14_ReprPCWk	-17625		chr12	130501688	130502586	LOC100190940	-	IG_NC	2_TssAFlnk	24301																													chr10	73479696	73479848	CDH23	+
chr16	86546979	86548895	FOXF1	+	GB_SHO	13_ReprPC	-4762		chr12	130961479	130961986	RIMBP2	-	GB_NC	12_EnhBiv	238840																													chr10	77794591	77794696	C10orf11	+
chr16	88807658	88807707	PIEZO1	-	GB_SHE	4_Tx	43912		chr12	132105972	132106088	SFSWAP	+	IG_NC	12_EnhBiv	89538																													chr10	94450866	94451736	HHEX	+
chr16	88832476	88832667	PIEZO1	-	GB_NC	7_Enh	18952		chr12	132851518	132852053	LOC100130238	+	PP_SHE	2_TssAFlnk,7_Enh	-76																													chr10	94820923	94820988	CYP26C1	+
chr16	88849599	88850534	PIEZO1	-	GB_CGI	2_TssAFlnk	1085		chr12	132854031	132855224	LOC100130238	+	GB_SHO	12_EnhBiv	-2054																													chr10	102977648	102979058	LBX1	-
chr17	872762	873255	NXN	-	GB_NC	5_TxWk	9755		chr12	132900464	132900620	GALNT9	-	GB_CGI	12_EnhBiv	5315																													chr10	102995719	102996798	FLJ41350	+
chr17	1094308	1094496	ABR	-	DP_NC	7_Enh	37819		chr12	133009863	133010900	FBRSL1	+	IG_CGI	12_EnhBiv	55237																													chr10	102997782	102998662	FLJ41350	+
chr17	7257885	7258501	TMEM95	+	PP_SHE	7_Enh	-59		chr12	133301730	133302266	ANKLE2	-	DS_SHO	6_EnhG	36208																													chr10	112258641	112259305	DUSP5	+
chr17	7792061	7792191	CHD3	+	PP_SHE	1_TssA	-4067		chr12	133351630	133352552	GOLGA3	-	GB_SHO	6_EnhG	52892																													chr10	117884825	117885028	GFRA1	-
chr17	8301118	8301697	RNF222	-	PP_NC	7_Enh	-553		chr13	30088615	30088729	SLC7A1	-	GB_CGI	6_EnhG	81096																													chr10	126851162	126851326	CTBP2	-
chr17	16282382	16282434	UBB	+	DP_SHO	15_Quies	1678		chr13	99135543	99135804	STK24	-	GB_NC	7_Enh	94390																													chr10	127569494	127569905	DHX32	-
chr17	25798415	25799447	KSR1	+	PP_NC	7_Enh	-15777		chr13	110885015	110885926	COL4A1	-	GB_NC	2_TssAFlnk	73570																													chr10	129845660	129845739	PTPRE	+
chr17	37028650	37029974	LASP1	+	GB_SHO	7_Enh	-3862		chr13	111747937	111748083	ARHGEF7	+	IG_SHE	13_ReprPC	18823																													chr10	130063978	130064296	AK124226	+
chr17	39680217	39680504	JUP	-	GB_SHE	3_TxFlnk	262679		chr13	112292532	112292610	TEX29	+	IG_NC	7_Enh	-324079																													chr10	130229935	130230059	AK124226	+
chr17	39780836	39782091	KRT17	-	PP_NC	5_TxWk	-997		chr13	112838528	112838611	CR627049	+	IG_NC	12_EnhBiv	13053																													chr10	130274436	130274509	AK124226	+
chr17	42345478	42345612	SLC4A1	-	PP_NC	14_ReprPCWk	-103		chr13	113491766	113492103	ATP11A	+	GB_SHO	6_EnhG	-147460																													chr10	134596943	134597358	INPP5A	+
chr17	43224180	43224418	HEXIM1	+	PP_SHO	7_Enh	266		chr13	113613272	113614132	BC035340	+	DP_NC	7_Enh	-56763																													chr11	313354	314074	IFITM1	+
chr17	48970357	48971001	TOB1-AS1	+	IG_NC	7_Enh	-26961		chr13	113624866	113625160	MCF2L	+	GB_SHO	12_EnhBiv	-76468																													chr11	315751	316456	IFITM1	+
chr17	55828038	55828107	7SK	+	IG_NC	15_Quies	-20789389		chr13	113698408	113699016	MCF2L	+	GB_SHE	7_Enh	-150324																													chr11	640446	641042	DRD4	+
chr17	59480470	59481280	TBX2	+	GB_CGI	13_ReprPC	-4023		chr13	114763268	114764489	RASA3	-	GB_CGI	6_EnhG	133597																													chr11	2036573	2036771	H19	-
chr17	73642080	73642773	SMIM6	+	PP_NC	7_Enh	-450		chr13	114801587	114803271	RASA3	-	GB_SHO	6_EnhG	94815																													chr11	2162341	2162445	INS-IGF2	-
chr17	73840750	73842017	WBP2	-	PP_NC	1_TssA	10571		chr13	114916698	114917297	RASA3	-	IG_SHE	7_Enh	-19211																													chr11	2162478	2162917	INS-IGF2	-
chr17	74639731	74639928	ST6GALNAC1	-	PP_NC	15_Quies	-8		chr13	114927579	114927664	RASA3	-	IG_SHO	12_EnhBiv	-29578																													chr11	2163174	2163808	INS-IGF2	-
chr17	74868220	74869001	MGAT5B	+	PP_SHO	7_Enh	-4463		chr14	64675538	64675705	SYNE2	+	GB_NC	6_EnhG	-356022																													chr11	2883529	2884460	KCNQ1DN	+
chr17	75282040	75282140	2009-09-01	+	GB_SHE	7_Enh	-5489		chr14	94392718	94393718	FAM181A	+	PP_NC	7_Enh	-8478																													chr11	3175552	3175636	OSBPL5	-
chr17	75315081	75315244	2009-09-01	+	PP_NC	7_Enh	-38593		chr14	94423192	94423872	ASB2	-	PP_NC	7_Enh	19265																													chr11	3187921	3188016	OSBPL5	-
chr17	75318655	75320035	2009-09-01	+	GB_NC	2_TssAFlnk,7_Enh	-43384		chr14	95078599	95079224	SERPINA3	+	PP_NC	14_ReprPCWk	-510																													chr11	13983790	13983893	SPON1	+
chr17	75451779	75451932	2009-09-01	+	GB_SHE	7_Enh	-175281		chr14	100203730	100204528	EML1	+	IG_CGI	2_TssAFlnk	-498																													chr11	16631866	16633647	SOX6	-
chr17	78818578	78819092	RPTOR	+	GB_CGI	15_Quies,7_Enh	-300473		chr14	101347044	101347284	RTL1	-	PP_SHO	6_EnhG	3900																													chr11	32451461	32452370	WT1	-
chr17	78865263	78866235	RPTOR	+	GB_SHO	5_TxWk	-347616		chr14	102685246	102685729	WDR20	+	GB_NC	6_EnhG	-79889																													chr11	34535377	34535568	ELF5	-
chr17	79031550	79032487	BAIAP2	+	GB_NC	7_Enh	-23539		chr14	103415458	103416389	CDC42BPB	-	GB_NC	6_EnhG	107410																													chr11	44327869	44328423	ALX4	-
chr17	79282893	79283128	LINC00482	-	PP_SHO	7_Enh	-80		chr14	103432754	103433189	CDC42BPB	-	GB_SHE	6_EnhG	90610																													chr11	57364841	57364939	SERPING1	+
chr17	79304420	79304683	TMEM105	-	PP_NC	7_Enh	-209		chr14	104190678	104190829	ZFYVE21	+	GB_SHE	7_Enh	-8762																													chr11	61522002	61522498	MYRF	+
chr17	80196719	80197360	SLC16A3	+	GB_SHO	6_EnhG	-11087		chr14	105011965	105012513	AX746996	-	IG_NC	12_EnhBiv	-33767																													chr11	62474725	62475078	HNRNPUL2-BSCL2	-
chr17	80255457	80256046	BC033560	-	IG_NC	7_Enh	-4767		chr14	105045877	105046247	C14orf180	+	PP_NC	7_Enh	-226																													chr11	63530997	63532696	C11orf95	-
chr17	80797881	80798078	ZNF750	-	PP_NC	5_TxWk	376		chr14	105359836	105359964	CEP170B	+	GB_CGI	12_EnhBiv	-28347																													chr11	63655748	63656090	MARK2	+
chr17	80829261	80829604	TBCD	+	GB_SHO	5_TxWk	-119664		chr14	105436973	105437141	AHNAK2	-	GB_NC	7_Enh	7553																													chr11	63827361	63828039	MACROD1	-
chr17	80832328	80834228	TBCD	+	GB_SHE	7_Enh	-124288		chr14	105783627	105784090	PACS2	+	GB_SHO	7_Enh	-17190																													chr11	63852804	63852887	MACROD1	-
chr17	80858406	80858893	TBCD	+	GB_SHO	7_Enh	-148953		chr15	42130650	42130735	PLA2G4B	+	PP_NC	6_EnhG	-10452																													chr11	63912583	63912769	MACROD1	-
chr17	81039747	81040724	METRNL	+	GB_SHO	7_Enh	-3157		chr15	70767419	70767649	UACA	-	IG_NC	7_Enh	288283																													chr11	64108241	64108790	CCDC88B	+
chr17	81042554	81043176	METRNL	+	GB_CGI	6_EnhG	-5609		chr15	78384520	78384868	SH2D7	+	PP_NC	7_Enh	-14718																													chr11	64135674	64136015	RPS6KA4	+
chr17	81047183	81047941	METRNL	+	GB_CGI	7_Enh	-10374		chr15	86315115	86315211	KLHL25	-	PP_SHE	7_Enh	23050																													chr11	64951536	64952034	CAPN1	+
chr17	81049009	81050089	METRNL	+	GB_SHO	7_Enh	-12522		chr15	93139398	93139515	DQ578058	+	IG_NC	7_Enh	161																													chr11	65306731	65307006	LTBP3	-
chr18	2913168	2913254	EMILIN2	+	GB_CGI	4_Tx	-66226		chr15	93617141	93617965	RGMA	-	PP_CGI	11_BivFlnk	14468																													chr11	65313608	65315466	LTBP3	-
chr18	21452788	21453131	LAMA3	+	PP_NC	5_TxWk	-183724		chr15	100681253	100681386	ADAMTS17	-	GB_NC	12_EnhBiv	200824																													chr11	65352168	65353092	EHBP1L1	+
chr18	24125409	24126361	KCTD1	-	GB_SHO	2_TssAFlnk	111004		chr16	474271	474528	RAB11FIP3	+	PP_SHO	12_EnhBiv	1091																													chr11	65359521	65360509	KCNK7	-
chr18	74804128	74805219	MBP	-	GB_CGI	7_Enh	40420		chr16	891283	891400	LMF1	-	IG_SHE	7_Enh	139918																													chr11	65414261	65415260	SIPA1	+
chr19	751098	751241	MISP	+	PP_SHE	7_Enh	-115		chr16	1026944	1027604	LMF1	-	GB_SHE	7_Enh	3714																													chr11	67142001	67142268	LOC100130987	+
chr19	939731	940967	ARID3A	+	GB_CGI	5_TxWk	-15186		chr16	1041053	1041333	SOX8	+	DP_CGI	12_EnhBiv	-9525																													chr11	68919873	68920466	BC064339	-
chr19	1168354	1169138	SBNO2	-	GB_CGI	1_TssA	5144		chr16	1093823	1094813	SSTR5-AS1	-	IG_SHE	11_BivFlnk	33894																													chr11	69454727	69455111	CCND1	+
chr19	2525231	2525459	GNG7	-	GB_CGI	7_Enh	177248		chr16	1096348	1096754	SSTR5-AS1	-	IG_SHO	7_Enh	31953																													chr11	70961596	70961902	SHANK2	-
chr19	2607726	2607903	GNG7	-	GB_CGI	5_TxWk	94804		chr16	1230137	1230997	CACNA1H	+	GB_CGI	7_Enh	-27756																													chr11	72982929	72982996	P2RY6	+
chr19	3136019	3136430	GNA15	+	PP_NC	15_Quies	-239		chr16	2054944	2055684	TCRBV20S1	-	GB_SHO	6_EnhG	117409																													chr11	94278324	94278912	PIWIL4	+
chr19	5141352	5142391	KDM4B	+	GB_CGI	6_EnhG	-173266		chr16	2082689	2083393	TCRBV20S1	-	PP_SHE	2_TssAFlnk	89700																													chr11	113577120	113577528	TMPRSS5	-
chr19	5147855	5148409	KDM4B	+	GB_CGI	4_Tx	-179284		chr16	11835360	11835562	TXNDC11	-	GB_SHO	2_TssAFlnk	1172																													chr11	113947036	113947203	ZBTB16	+
chr19	5913854	5915215	CAPS	+	PP_SHO	2_TssAFlnk	-3497		chr16	11876381	11876912	ZC3H7A	-	GB_NC	7_Enh	14211																													chr11	124621829	124622444	ESAM	-
chr19	6333547	6333761	ACER1	-	PP_NC	15_Quies	-121		chr16	19124925	19124984	ITPRIPL2	+	PP_SHO	2_TssAFlnk	270																													chr11	129244105	129244523	BARX2	+
chr19	6744898	6745717	TRIP10	+	GB_SHO	2_TssAFlnk,6_EnhG,7_Enh	-7781		chr16	29706275	29706381	BOLA2	-	GB_CGI	6_EnhG	-240096																													chr12	5153711	5154148	KCNA5	+
chr19	11305231	11305924	KANK2	-	PP_SHO	6_EnhG	2543		chr16	30124803	30124904	BOLA2	-	PP_NC	6_EnhG	-658619																													chr12	6438502	6439077	TNFRSF1A	-
chr19	13947284	13948243	FW420894	+	PP_SHE	6_EnhG	125		chr16	30379391	30380600	TBC1D10B	-	GB_SHO	2_TssAFlnk	985																													chr12	6484521	6485537	LTBR	+
chr19	13951168	13951845	LOC284454	-	DP_SHO	1_TssA,2_TssAFlnk,3_TxFlnk	-3695		chr16	54228169	54228582	FTO	+	IG_CGI	2_TssAFlnk	-490707																													chr12	6881590	6883124	LAG3	+
chr19	18385672	18386421	KIAA1683	-	PP_NC	7_Enh	-1102		chr16	57566936	57567919	CCDC102A	-	GB_SHE	7_Enh	2592																													chr12	7055452	7056008	PTPN6	+
chr19	35606534	35607221	FXYD3	+	PP_NC	7_Enh	-489		chr16	66400320	66400599	CDH5	+	PP_NC	2_TssAFlnk	-66																													chr12	30976001	30976349	LINC00941	+
chr19	35981517	35981677	KRTDAP	-	PP_NC	7_Enh	4783		chr16	66876847	66876938	AF086125	-	PP_SHO	12_EnhBiv	10413																													chr12	49687715	49688980	PRPH	+
chr19	35992791	35992984	DMKN	-	PP_NC	7_Enh	11576		chr16	67977865	67978450	SLC12A4	-	PP_NC	6_EnhG	25054																													chr12	49731640	49731991	C1QL4	-
chr19	44285333	44286076	KCNN4	-	PP_NC	7_Enh	-667		chr16	73265937	73266785	HCCAT5	+	IG_NC	12_EnhBiv	-140537																													chr12	52408387	52409033	GRASP	+
chr19	46801557	46801672	HIF3A	+	PP_SHO	2_TssAFlnk	-1369		chr16	75150784	75150880	LDHD	-	PP_SHO	7_Enh	-211																													chr12	52473422	52474047	bpl 41-16	+
chr19	47735882	47736018	BBC3	-	PP_SHO	7_Enh	5		chr16	83968260	83968360	OSGIN1	+	IG_NC	12_EnhBiv	13527																													chr12	53297987	53298888	KRT8	-
chr19	49055390	49055443	SULT2B1	+	PP_NC	7_Enh	-111		chr16	85157762	85158047	FAM92B	-	IG_CGI	7_Enh	-11933																													chr12	58013324	58013569	SLC26A10	+
chr19	55586493	55587039	EPS8L1	+	PP_NC	7_Enh	-3651		chr16	86965114	86965605	AK125749	-	IG_CGI	12_EnhBiv	370763																													chr12	58013651	58013915	SLC26A10	+
chr19	56047632	56048075	SBK2	-	GB_CGI	15_Quies	381		chr16	88459356	88459662	ZNF469	+	IG_CGI	12_EnhBiv	34217																													chr12	89748726	89749377	DUSP6	-
chr20	11898478	11898557	BTBD3	+	PP_NC	5_TxWk	-27186		chr16	88485429	88485656	ZNF469	+	DP_NC	5_TxWk	8223																													chr12	106533667	106534276	NUAK1	-
chr20	30308440	30310246	BCL2L1	-	GB_SHO	2_TssAFlnk	1546		chr16	88975851	88976453	CBFA2T3	-	GB_CGI	7_Enh	67159																													chr12	109162390	109162641	SSH1	-
chr20	34699419	34700376	EPB41L1	+	GB_NC	7_Enh	-20950		chr16	89118603	89119663	AK055272	-	IG_CGI	12_EnhBiv	-290																													chr12	113599272	113599683	DDX54	-
chr20	35168979	35169380	BC039668	-	PP_CGI	7_Enh	32298		chr16	89151047	89151852	ACSF3	+	DP_NC	7_Enh	2931																													chr12	122019006	122021013	KDM2B	-
chr20	35972312	35973318	SRC	+	PP_SHO	7_Enh	-230		chr16	89763816	89764314	SPATA2L	-	GB_SHE	6_EnhG	3799																													chr12	124429745	124430049	CCDC92	-
chr20	36011999	36012016	SRC	+	GB_SHO	7_Enh	-38928		chr17	932700	933179	ABR	-	GB_CGI	2_TssAFlnk	199136																													chr12	125130348	125131234	NCOR2	-
chr20	36152923	36154222	BLCAP	-	PP_SHE	7_Enh	2111		chr17	1094299	1094555	ABR	-	DP_NC	7_Enh	37760																													chr12	125223502	125223679	SCARB1	-
chr20	37228520	37229532	ARHGAP40	+	PP_SHO	7_Enh	1045		chr17	1633714	1634018	WDR81	+	GB_SHE	6_EnhG	-14201																													chr12	130590137	130590671	FZD10-AS1	-
chr20	44574271	44575021	PCIF1	+	GB_CGI	4_Tx	-11754		chr17	3819880	3820910	P2RX1	-	PP_NC	7_Enh	-1116																													chr12	133158791	133160509	FBRSL1	+
chr20	52687076	52687394	BCAS1	-	PP_NC	7_Enh	-90		chr17	7258481	7258501	TMEM95	+	PP_SHE	7_Enh	-59																													chr12	133312061	133312243	ANKLE2	-
chr20	54987020	54987140	CASS4	+	PP_NC	5_TxWk	28		chr17	7792059	7792191	CHD3	+	PP_SHE	7_Enh	-4067																													chr13	20392431	20392706	ZMYM5	-
chr20	61002595	61003303	RBBP8NL	-	PP_NC	5_TxWk	-714		chr17	10560609	10561773	MYH3	-	PP_NC	1_TssA	-1147																													chr13	36051666	36052768	NBEA	+
chr20	61288142	61288351	SLCO4A1	+	GB_CGI	7_Enh	-14554		chr17	17717208	17718525	MIR33B	-	PP_SHO	6_EnhG	-1280																													chr13	50706583	50707586	DLEU1	+
chr20	62168764	62168809	PTK6	-	PP_SHO	7_Enh	-86		chr17	18854715	18854799	SLC5A10	+	PP_NC	12_EnhBiv	-1141																													chr13	113411110	113411200	ATP11A	+
chr20	62318426	62318588	RTEL1-TNFRSF6B	+	GB_CGI	7_Enh	-27935		chr17	30821755	30821957	MYO1D	-	GB_SHO	7_Enh	382238																													chr13	113743564	113744320	MCF2L	+
chr21	43098598	43098958	LINC00111	+	PP_NC	7_Enh	383		chr17	38707719	38708809	CCR7	-	DS_NC	7_Enh	12915																													chr14	23290798	23291749	SLC7A7	-
chr21	44876604	44876687	LINC00319	+	DS_CGI	7_Enh	-10206		chr17	40439433	40439628	STAT5A	+	PP_SHO	2_TssAFlnk	-63																													chr14	54685790	54686625	CDKN3	+
chr21	46890849	46891839	COL18A1	+	GB_CGI	7_Enh	-66787		chr17	40695519	40696263	NAGLU	+	GB_NC	6_EnhG	-8073																													chr14	60982635	60983335	SIX6	+
chr22	36044151	36044486	APOL6	+	PP_NC	5_TxWk	-44		chr17	41003155	41003399	AOC3	+	PP_NC	2_TssAFlnk	-198																													chr14	61748243	61748440	PRKCH	+
chr22	38071170	38071602	LGALS1	+	PP_SHO	7_Enh	13		chr17	48266593	48268237	HV555657	-	GB_NC	3_TxFlnk	-472																													chr14	65169664	65170209	PLEKHG3	+
chr22	41763093	41763370	TEF	+	PP_NC	7_Enh	-33		chr17	55663225	55663284	MSI2	+	GB_NC	12_EnhBiv	-330072																													chr14	69095057	69095679	RAD51B	+
chr22	46481603	46481948	MIRLET7BHG	+	PP_SHO	7_Enh	-31877		chr17	72442928	72443401	GPRC5C	+	GB_CGI	6_EnhG	-22411																													chr14	95238671	95239464	GSC	-
chr22	50720468	50721626	PLXNB2	-	GB_CGI	6_EnhG	24430		chr17	73055792	73056681	KCTD2	+	GB_NC	6_EnhG	-28011																													chr14	99880393	99880573	SETD3	-
									chr17	74075092	74075195	ZACN	+	PP_SHO	12_EnhBiv	-7153																													chr15	27111435	27111476	GABRB3	-
									chr17	74525046	74525125	PRCD	+	GB_NC	7_Enh	-1457																													chr15	65394414	65394873	UBAP1L	-
									chr17	75315486	75315667	2009-09-01	+	PP_NC	12_EnhBiv	-39016																													chr15	66998947	66999484	SMAD6	+
									chr17	76220608	76220955	EPR-1	-	GB_NC	6_EnhG	172																													chr15	67356310	67356942	SMAD3	+
									chr17	76446778	76446851	DNAH17	-	GB_CGI	7_Enh	126625																													chr15	74424054	74426925	ISLR2	+
									chr17	76672156	76672843	CYTH1	-	GB_NC	6_EnhG	105536																													chr15	74427234	74427499	ISLR2	+
									chr17	76975944	76976352	LGALS3BP	-	PP_NC	2_TssAFlnk	-161																													chr15	93652756	93653310	RGMA	-
									chr17	77042315	77042745	C1QTNF1	+	GB_SHO	12_EnhBiv	-23849																													chr15	96890626	96891026	NR2F2	+
									chr17	78079608	78079795	GAA	+	GB_CGI	12_EnhBiv	-4440																													chr15	96904723	96907756	NR2F2	+
									chr17	78161227	78161572	CARD14	+	PP_SHE	7_Enh	-17781																													chr15	99978986	99979346	LRRC28	+
									chr17	78439556	78439812	AX746631	-	DS_SHE	12_EnhBiv	-163																													chr15	101418967	101419148	ALDH1A3	+
									chr17	78753756	78753887	RPTOR	+	GB_NC	7_Enh	-235268																													chr15	101690179	101690228	CHSY1	-
									chr17	78800767	78800806	RPTOR	+	GB_SHO	6_EnhG	-282187																													chr16	433504	434256	LOC100134368	+
									chr17	78864088	78865514	RPTOR	+	GB_SHO	7_Enh	-346895																													chr16	979488	979662	LMF1	-
									chr17	78916378	78917019	RPTOR	+	GB_SHO	7_Enh	-398400																													chr16	1030166	1030444	LMF1	-
									chr17	79004850	79005047	BAIAP2-AS1	-	GB_SHO	7_Enh	3454																													chr16	8807011	8807043	ABAT	+
									chr17	79099481	79099942	MIR338	+	PP_SHE	7_Enh	-265																													chr16	11367459	11367783	RMI2	+
									chr17	79109729	79109910	AATK	-	GB_CGI	7_Enh	29967																													chr16	31053489	31053962	BC039500	+
									chr17	79225573	79225857	SLC38A10	-	GB_NC	6_EnhG	43490																													chr16	31227884	31228555	TRIM72	+
									chr17	79390726	79391071	BAHCC1	+	GB_SHE	7_Enh	-17186																													chr16	31487813	31489209	TGFB1I1	+
									chr17	79701478	79701610	SLC25A10	+	IG_NC	7_Enh	-31206																													chr16	54316931	54318115	IRX3	-
									chr17	80197360	80197898	SLC16A3	+	DS_SHO	6_EnhG	-11625																													chr16	54321848	54322984	IRX3	-
									chr17	80200785	80201299	CSNK1D	-	GB_SHO	6_EnhG	30308																													chr16	54325015	54325929	IRX3	-
									chr17	80336304	80336414	AF075112	-	DS_SHE	12_EnhBiv	4097																													chr16	54611564	54611722	IRX3	-
									chr17	80561084	80561461	FOXK2	+	GB_SHO	6_EnhG	-83872																													chr16	57562452	57563395	CCDC102A	-
									chr18	24445134	24445318	AQP4-AS1	+	PP_SHO	12_EnhBiv	-209612																													chr16	57831841	57832309	KIFC3	-
									chr19	474973	475042	ODF3L2	-	PP_NC	7_Enh	-59																													chr16	67232921	67233861	ELMO3	+
									chr19	847943	848071	PRTN3	+	GB_CGI	12_EnhBiv	-7108																													chr16	67428155	67428898	ZDHHC1	-
									chr19	940724	941243	ARID3A	+	GB_CGI	7_Enh	-15462																													chr16	68003410	68003657	SLC12A4	-
									chr19	2064854	2065374	MOB3A	-	IG_CGI	7_Enh	31298																													chr16	84822990	84823224	USP10	+
									chr19	2255440	2255848	JSRP1	-	GB_SHO	2_TssAFlnk	13910																													chr16	85295997	85296220	LINC00311	+
									chr19	2866899	2867410	ZNF556	+	PP_NC	2_TssAFlnk	-77																													chr16	85478580	85479053	MIR5093	-
									chr19	3387811	3388047	NFIC	+	GB_CGI	6_EnhG	-28486																													chr16	85497585	85498042	GSE1	+
									chr19	4371730	4371934	SH3GL1	-	GB_CGI	6_EnhG	28610																													chr16	85543209	85543698	GSE1	+
									chr19	4455316	4455957	UBXN6	-	PP_SHO	2_TssAFlnk	1862																													chr16	85600235	85600639	GSE1	+
									chr19	4639923	4640159	TNFAIP8L1	+	PP_SHO	2_TssAFlnk	-629																													chr16	85648263	85649026	GSE1	+
									chr19	5507274	5507344	ZNRF4	+	IG_CGI	14_ReprPCWk	-51918																													chr16	85659946	85660534	GSE1	+
									chr19	11280655	11280913	KANK2	-	GB_CGI	6_EnhG	27554																													chr16	88946905	88947943	CBFA2T3	-
									chr19	13112449	13113893	NFIX	+	GB_CGI	2_TssAFlnk	-7471																													chr16	89258571	89259957	CDH15	+
									chr19	14260587	14260651	LPHN1	-	GB_SHO	7_Enh	56348																													chr17	171006	171257	RPH3AL	-
									chr19	14671371	14671512	TECR	+	GB_NC	7_Enh	-43615																													chr17	981643	982154	ABR	-
									chr19	15375283	15375450	BRD4	-	GB_NC	6_EnhG	67906																													chr17	3907349	3907499	AB062083	-
									chr19	15783239	15783791	CYP4F12	+	PP_NC	7_Enh	-224																													chr17	4692162	4692377	GLTPD2	+
									chr19	16830613	16830859	NWD1	+	PP_NC	7_Enh	-72																													chr17	4803506	4804104	C17orf107	+
									chr19	18260330	18260515	MAST3	+	GB_CGI	6_EnhG	-51912																													chr17	7340867	7341440	TMEM102	+
									chr19	18385244	18386421	KIAA1683	-	PP_NC	6_EnhG	-1102																													chr17	7756609	7757646	KDM6B	+
									chr19	35085474	35085677	AX748165	-	PP_NC	7_Enh	80927																													chr17	7758581	7759140	TMEM88	+
									chr19	40168558	40169839	LGALS17A	+	PP_NC	7_Enh	175																													chr17	8648175	8648562	CCDC42	-
									chr19	46284048	46286475	DMWD	-	PP_SHE	2_TssAFlnk	9585																													chr17	17603749	17604184	RAI1	+
									chr19	49577162	49577303	KCNA7	-	PP_SHO	12_EnhBiv	-1105																													chr17	17684010	17684240	RAI1	+
									chr19	55997780	55998081	NAT14	+	GB_CGI	7_Enh	-1710																													chr17	17712609	17713671	RAI1	+
									chr20	2276503	2276663	TGM3	+	PP_NC	7_Enh	-16																													chr17	26711393	26712092	SARM1	+
									chr20	3687817	3688314	SIGLEC1	-	PP_NC	7_Enh	-539																													chr17	27410759	27411642	MYO18A	-
									chr20	3693158	3693221	SIGLEC1	-	DP_NC	2_TssAFlnk	-5446																													chr17	33775952	33776116	SLFN13	-
									chr20	11898478	11898851	BTBD3	+	PP_NC	1_TssA	-27480																													chr17	35423464	35424059	AATF	+
									chr20	17595355	17595472	RRBP1	-	GB_CGI	6_EnhG	67468																													chr17	36667233	36667782	ARHGAP23	+
									chr20	19866743	19867145	RIN2	+	PP_NC	2_TssAFlnk	20																													chr17	38517913	38518520	GJD3	-
									chr20	20036936	20037150	C20orf26	+	PP_SHE	15_Quies	-3992																													chr17	40822424	40824361	PLEKHH3	-
									chr20	30060884	30061044	DEFB124	-	PP_SHO	7_Enh	3516																													chr17	40837037	40840012	CNTNAP1	+
									chr20	30406688	30407388	MYLK2	+	PP_SHE	2_TssAFlnk	-277																													chr17	43046275	43047405	C1QL1	-
									chr20	35274627	35274715	SLA2	-	PP_NC	15_Quies	-96																													chr17	46604393	46604774	HOXB1	-
									chr20	43343233	43343760	LOC79015	-	PP_NC	7_Enh	-42853																													chr17	46671861	46672255	HOXB-AS3	+
									chr20	43882990	43883746	SLPI	-	PP_NC	14_ReprPCWk	-541																													chr17	59478579	59479070	TBX2	+
									chr20	45179157	45179230	OCSTAMP	-	PP_NC	14_ReprPCWk	-17																													chr17	72207518	72208213	MGC16275	-
									chr20	56136053	56136167	PCK1	+	PP_NC	7_Enh	-31																													chr17	73073239	73073878	SLC16A5	+
									chr20	57471654	57471844	GNAS	+	GB_SHE	6_EnhG	-57071																													chr17	75143118	75143600	SEC14L1	+
									chr20	60882647	60882801	ADRM1	+	GB_CGI	4_Tx	-5652																													chr17	75471203	75471491	2009-09-01	+
									chr20	62200285	62200850	HELZ2	-	GB_CGI	6_EnhG	4742																													chr17	76264037	76264518	LOC100996291	-
									chr20	62367372	62367961	LIME1	+	PP_SHO	6_EnhG	-1146																													chr17	77750385	77751089	CBX2	+
									chr21	37851847	37852492	CLDN14	-	PP_NC	7_Enh	96375																													chr17	77808014	77810742	CBX4	-
									chr21	45559838	45561490	C21orf33	+	GB_CGI	6_EnhG	-8003																													chr17	77923275	77925136	TBC1D16	-
									chr21	46378243	46379089	FAM207A	+	GB_CGI	6_EnhG	-19164																													chr17	78195418	78195515	SLC26A11	+
									chr21	46875142	46875433	COL18A1	+	PP_SHO	2_TssAFlnk	-50381																													chr17	79231688	79232608	SLC38A10	-
									chr21	46890907	46891093	COL18A1	+	GB_CGI	7_Enh	-66041																													chr17	80186266	80186336	SLC16A3	+
									chr21	47813025	47813491	PCNT	+	GB_CGI	6_EnhG	-69455																													chr17	80189973	80190154	SLC16A3	+
									chr22	20236751	20237222	RTN4R	-	PP_NC	7_Enh	33547																													chr17	80833054	80833638	TBCD	+
									chr22	24979436	24979964	GGT1	+	PP_NC	7_Enh	-246																													chr18	3498854	3499813	DLGAP1	-
									chr22	29706754	29708246	GAS2L1	+	GB_CGI	6_EnhG	-5674																													chr18	20714217	20714496	CABLES1	+
									chr22	30867939	30868226	SEC14L3	-	PP_NC	13_ReprPC	-190																													chr18	20735005	20735693	CABLES1	+
									chr22	33196103	33196627	SYN3	-	PP_SHO	7_Enh	257731																													chr18	30051631	30051803	GAREM	-
									chr22	36013444	36013708	MB	-	PP_NC	7_Enh	20290																													chr18	30353073	30353699	KLHL14	-
									chr22	36681296	36681321	MYH9	-	GB_NC	6_EnhG	102742																													chr18	46500646	46501202	SMAD7	-
									chr22	38071188	38071591	LGALS1	+	PP_SHO	2_TssAFlnk	24																													chr18	56296449	56296544	ALPK2	-
									chr22	39709853	39710068	RPL3	-	PP_NC	6_EnhG	6326																													chr18	56529149	56529866	ZNF532	+
									chr22	39712633	39712730	RPL3	-	PP_SHE	6_EnhG	3664																													chr18	57564897	57566300	PMAIP1	+
									chr22	39917833	39919237	DQ601415	+	GB_SHO	3_TxFlnk	294																													chr18	67070170	67070461	DOK6	+
									chr22	43042879	43044071	CYB5R3	-	PP_SHO	7_Enh	1503																													chr18	77171832	77172633	NFATC1	+
									chr22	44568725	44568913	PARVG	+	PP_NC	7_Enh	-77																													chr19	2250561	2252786	JSRP1	-
									chr22	46448690	46450107	MIRLET7BHG	+	PP_CGI	1_TssA	-381																													chr19	2253398	2253854	JSRP1	-
									chr22	46469091	46471442	MIRLET7BHG	+	IG_SHO	3_TxFlnk	-19365																													chr19	3364892	3365201	NFIC	+
									chr22	46472568	46473721	MIRLET7BHG	+	DP_NC	3_TxFlnk	-22842																													chr19	3369714	3370244	NFIC	+
									chr22	46481099	46482009	MIRLET7BHG	+	PP_SHO	6_EnhG	-31373																													chr19	3463241	3465714	NFIC	+
									chr22	50173724	50174297	LOC90834	-	PP_SHE	6_EnhG	234																													chr19	3687751	3688477	PIP5K1C	-
									chr22	50720468	50721368	PLXNB2	-	GB_CGI	6_EnhG	24688																													chr19	4045025	4045108	ZBTB7A	-
																																													chr19	8575566	8576249	ZNF414	-
																																													chr19	10928172	10928327	MIR199A1	-
																																													chr19	11471954	11472731	LPPR2	+
																																													chr19	11594384	11594640	ZNF653	-
																																													chr19	12707809	12708001	ZNF490	-
																																													chr19	13120987	13123217	NFIX	+
																																													chr19	13207445	13208599	NFIX	+
																																													chr19	14072965	14074823	RFX1	-
																																													chr19	14196326	14196582	C19orf67	-
																																													chr19	15343170	15343350	EPHX3	-
																																													chr19	15343786	15344364	EPHX3	-
																																													chr19	17608110	17608394	SLC27A1	+
																																													chr19	17688104	17688265	COLGALT1	+
																																													chr19	18979397	18980744	GDF1	-
																																													chr19	31847893	31848310	TSHZ3	-
																																													chr19	35632493	35633444	FXYD1	+
																																													chr19	38876250	38877220	GGN	-
																																													chr19	41119353	41120329	LTBP4	+
																																													chr19	41129881	41129962	LTBP4	+
																																													chr19	44005808	44006148	PHLDB3	-
																																													chr19	45259535	45260501	BCL3	+
																																													chr19	46806907	46807272	HIF3A	+
																																													chr19	46995312	46997775	BC132841	+
																																													chr19	49244571	49244674	IZUMO1	-
																																													chr19	49713645	49714044	TRPM4	+
																																													chr19	50059750	50060306	NOSIP	-
																																													chr19	52206258	52206691	LINC00085	+
																																													chr19	55887704	55888146	TMEM190	+
																																													chr20	3149249	3149470	LZTS3	-
																																													chr20	21371547	21372126	XRN2	+
																																													chr20	21688203	21689759	PAX1	+
																																													chr20	31352228	31352874	DNMT3B	+
																																													chr20	33451149	33451427	GGT7	-
																																													chr20	39969536	39969604	LPIN3	+
																																													chr20	50419214	50419348	SALL4	-
																																													chr20	56725899	56726093	C20orf85	+
																																													chr21	27540106	27540728	APP	-
																																													chr21	43185385	43186286	RIPK4	-
																																													chr21	43809360	43809848	TMPRSS3	-
																																													chr22	19709548	19712034	SEPT5-GP1BB	+
																																													chr22	20779896	20780508	SCARF2	-
																																													chr22	20783497	20785148	SCARF2	-
																																													chr22	28073992	28074146	MN1	-
																																													chr22	28198591	28200653	MN1	-
																																													chr22	30476098	30476285	HORMAD2	+
																																													chr22	38199759	38200221	H1F0	+
																																													chr22	46457384	46457998	MIRLET7BHG	+
																																													chr22	50165244	50165512	BRD1	-
[truncated: 19 more columns]
